# Supplementary material for: Effect of monitoring surgical outcomes using control charts to reduce major adverse events in patients: cluster randomised trial
Source: PubMed Central journal article supplement — BMJ. 2020 Nov 4;371:m3840. doi: 10.1136/bmj.m3840 (PMC7610189; doi:10.1136/bmj.m3840), 2020-11-04
Supplement: duca055782.ww.pdf [file duca055782.ww.pdf]

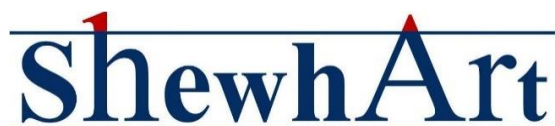

**Effect of monitoring surgical outcomes using control charts to reduce major adverse events in patients: cluster randomised trial**

This appendix has been provided by the authors to give readers additional information about their work

**Table of Contents**

|                                                                                                                                                                                            |           |
|--------------------------------------------------------------------------------------------------------------------------------------------------------------------------------------------|-----------|
| <b>Appendix. Operations and Procedures Codes .....</b>                                                                                                                                     | <b>2</b>  |
| <b>Appendix. Components of Control Chart–Based Program .....</b>                                                                                                                           | <b>5</b>  |
| <b>Appendix. Compliance with Control Chart–Based Program Implementation .....</b>                                                                                                          | <b>6</b>  |
| <b>Table S1. Patient Characteristics Across Operative Procedures by Study Group.....</b>                                                                                                   | <b>7</b>  |
| <b>Table S2. Hospital and Patient Characteristics by Study Group and Period.....</b>                                                                                                       | <b>9</b>  |
| <b>Table S3. Patient Characteristics Across Operative Procedures by Study Group and Period .....</b>                                                                                       | <b>10</b> |
| <b>Table S4. Comparison of Surgical Outcomes between Hospital Groups in Conventional and Ambulatory Surgery .....</b>                                                                      | <b>12</b> |
| <b>Table S5. Comparison of Surgical Outcomes by Hospital Group including Patients with Missing Household Income .....</b>                                                                  | <b>13</b> |
| <b>Table S6. Estimated Absolute Risk Differences and Number Needed to Treat.....</b>                                                                                                       | <b>14</b> |
| <b>Table S7. Estimated Relative Risk Differences and Major Adverse Events Avoided .....</b>                                                                                                | <b>14</b> |
| <b>Figure S1. Geographic Location of Participating Hospitals.....</b>                                                                                                                      | <b>15</b> |
| <b>Figure S2. Surgical Outcomes by Control Chart Implementation in Conventional and Ambulatory Surgery .....</b>                                                                           | <b>16</b> |
| <b>Figure S3. Surgical Outcomes Rates by Study Group and Period in Conventional Surgery.....</b>                                                                                           | <b>17</b> |
| <b>Figure S4. Surgical Outcomes Rates by Study Group and Period in Conventional and Ambulatory Surgery.....</b>                                                                            | <b>18</b> |
| <b>Figure S5. Difference in Standardised Rates of Major Adverse Events from Pre-implementation Period to Implementation Period by Hospital in Conventional Surgery .....</b>               | <b>19</b> |
| <b>Figure S6. Difference in Standardised Rates of Major Adverse Events from Pre-implementation Period to Implementation Period by Hospital in Conventional and Ambulatory Surgery.....</b> | <b>20</b> |

## Appendix. Operations and Procedures Codes

| Operation          | Surgical procedure                    | Procedure code | Detailed operation                                                                                            |
|--------------------|---------------------------------------|----------------|---------------------------------------------------------------------------------------------------------------|
| Appendectomy       | Laparoscopic appendectomy             | HHFA016        | Laparoscopic appendectomy                                                                                     |
| Appendectomy       | Laparoscopic appendectomy             | HHFA025        | Laparoscopic appendectomy with peritoneal lavage for peritonitis                                              |
| Appendectomy       | Open appendectomy                     | HHFA001        | Open iliac appendectomy                                                                                       |
| Appendectomy       | Open appendectomy                     | HHFA011        | Open appendectomy                                                                                             |
| Appendectomy       | Open appendectomy                     | HHFA020        | Open appendectomy with peritoneal lavage for peritonitis                                                      |
| Bariatric surgery  | Gastric banding                       | HFKA002        | Open gastric banding replacement for morbid obesity                                                           |
| Bariatric surgery  | Gastric banding                       | HFKA001        | Laparoscopic gastric banding replacement for morbid obesity                                                   |
| Bariatric surgery  | Gastric banding                       | HFMA009        | Open gastric banding for morbid obesity                                                                       |
| Bariatric surgery  | Gastric banding                       | HFMA011        | Open gastric banding repositioning /removal                                                                   |
| Bariatric surgery  | Gastric banding                       | HFMC007        | Laparoscopic gastric banding for morbid obesity                                                               |
| Bariatric surgery  | Gastric banding                       | HFMC008        | Laparoscopic gastric banding repositioning/removal                                                            |
| Bariatric surgery  | Roux-en-Y gastric bypass              | HFCA001        | Open gastric bypass for morbid obesity                                                                        |
| Bariatric surgery  | Roux-en-Y gastric bypass              | HFCC003        | Laparoscopic gastric bypass for morbid obesity                                                                |
| Bariatric surgery  | Sleeve gastrectomy                    | HHFA011        | Open sleeve gastrectomy                                                                                       |
| Bariatric surgery  | Sleeve gastrectomy                    | HHFC018        | Laparoscopic sleeve gastrectomy                                                                               |
| Cholecystectomy    | Laparoscopic cholecystectomy          | HMFC004        | Laparoscopic cholecystectomy                                                                                  |
| Cholecystectomy    | Open cholecystectomy                  | HMFA007        | Open cholecystectomy                                                                                          |
| Colorectal surgery | Ostomy and Hartman procedure reversal | HHMA003        | Open colostomy reversal                                                                                       |
| Colorectal surgery | Ostomy and Hartman procedure reversal | HHMC001        | Laparoscopic colostomy reversal                                                                               |
| Colorectal surgery | Rectal surgery                        | HJFA001        | Open rectosigmoid resection with pull through of the colon in the retro rectal space and coloanal anastomosis |
| Colorectal surgery | Rectal surgery                        | HJFA002        | Open rectosigmoidectomy with colorectal anastomosis                                                           |
| Colorectal surgery | Rectal surgery                        | HJFA004        | Laparoscopic rectosigmoidectomy with colorectal anastomosis                                                   |
| Colorectal surgery | Rectal surgery                        | HJFA006        | Open rectosigmoidectomy with coloanal anastomosis                                                             |
| Colorectal surgery | Rectal surgery                        | HJFA007        | Transanal abdominoperineal resection                                                                          |
| Colorectal surgery | Rectal surgery                        | HJFA017        | Laparoscopic rectosigmoidectomy with coloanal anastomosis                                                     |
| Colorectal surgery | Rectal surgery                        | HJFA019        | Laparoscopic abdominoperineal resection                                                                       |
| Colorectal surgery | Rectal surgery                        | HJFC031        | Laparoscopic rectosigmoidectomy without immediate anastomosis                                                 |
| Colorectal surgery | Rectopexy                             | HJDC001        | Laparoscopic rectopexy                                                                                        |
| Colorectal surgery | Segmental colectomy                   | HHFA002        | Laparoscopic left colectomy with splenic flexure mobilisation with immediate anastomosis                      |
| Colorectal surgery | Segmental colectomy                   | HHFA006        | Open left colectomy with splenic flexure mobilisation with immediate anastomosis                              |
| Colorectal surgery | Segmental colectomy                   | HHFA008        | Laparoscopic right colectomy with immediate anastomosis                                                       |
| Colorectal surgery | Segmental colectomy                   | HHFA009        | Open right colectomy with immediate anastomosis                                                               |
| Colorectal surgery | Segmental colectomy                   | HHFA010        | Laparoscopic left colectomy without splenic flexure mobilisation with immediate anastomosis                   |
| Colorectal surgery | Segmental colectomy                   | HHFA014        | Open left colectomy without splenic flexure mobilisation without immediate anastomosis                        |
| Colorectal surgery | Segmental colectomy                   | HHFA017        | Open left colectomy without splenic flexure mobilisation with immediate anastomosis                           |
| Colorectal surgery | Segmental colectomy                   | HHFA018        | Open transverse colectomy                                                                                     |
| Colorectal surgery | Segmental colectomy                   | HHFA023        | Laparoscopic transverse colectomy                                                                             |
| Colorectal surgery | Segmental colectomy                   | HHFA024        | Open left colectomy with splenic flexure mobilisation without immediate anastomosis                           |
| Colorectal surgery | Total colectomy or coloproctectomy    | HHFA004        | Laparoscopic total colectomy with ileo rectal anastomosis                                                     |
| Colorectal surgery | Total colectomy or coloproctectomy    | HHFA005        | Laparoscopic total colectomy without immediate anastomosis                                                    |
| Colorectal surgery | Total colectomy or coloproctectomy    | HHFA021        | Open total colectomy without immediate anastomosis                                                            |
| Colorectal surgery | Total colectomy or coloproctectomy    | HHFA022        | Open total colectomy with ileo rectal anastomosis                                                             |
| Colorectal surgery | Total colectomy or coloproctectomy    | HHFA028        | Laparoscopic total proctocolectomy with ileo anal anastomosis                                                 |
| Colorectal surgery | Total colectomy or coloproctectomy    | HHFA029        | Laparoscopic total proctocolectomy without immediate anastomosis                                              |

|                                 |                              |         |                                                                                                                                             |
|---------------------------------|------------------------------|---------|---------------------------------------------------------------------------------------------------------------------------------------------|
| Colorectal surgery              | Total colectomy or colectomy | HHFA030 | Open total proctocolectomy without immediate anastomosis                                                                                    |
| Colorectal surgery              | Total colectomy or colectomy | HHFA031 | Open total proctocolectomy with ileo anal anastomosis                                                                                       |
| Colorectal surgery              | Total colectomy or colectomy | HJFA012 | Open secondary proctectomy with ileo anal anastomosis after initial total colectomy                                                         |
| Colorectal surgery              | Total colectomy or colectomy | HJFC023 | Laparoscopic secondary proctectomy with ileo anal anastomosis after initial total colectomy                                                 |
| Oesophageal and gastric surgery | Fundoplication               | HFMA003 | Open fundoplication without division of short gastric vessels                                                                               |
| Oesophageal and gastric surgery | Fundoplication               | HFMA008 | Open fundoplication with division of short gastric vessels                                                                                  |
| Oesophageal and gastric surgery | Fundoplication               | HFMC001 | Laparoscopic fundoplication with division of short gastric vessels                                                                          |
| Oesophageal and gastric surgery | Fundoplication               | HFMC004 | Laparoscopic fundoplication without division of short gastric vessels                                                                       |
| Oesophageal and gastric surgery | Oesophagectomy               | HEFA001 | Oesophagectomy with oesophago-gastric anastomosis by left thoracic phrenotomy (sweet procedure)                                             |
| Oesophageal and gastric surgery | Oesophagectomy               | HEFA002 | Oesophagectomy with oesophago-gastric anastomosis by three field-laparotomy, right thoracotomy and cervical anastomosis (McKeown procedure) |
| Oesophageal and gastric surgery | Oesophagectomy               | HEFA003 | Open transthoracic oesophagectomy with laparoscopic gastric tube formation                                                                  |
| Oesophageal and gastric surgery | Oesophagectomy               | HEFA004 | Transhiatal oesophagectomy by laparotomy and cervicotomy                                                                                    |
| Oesophageal and gastric surgery | Oesophagectomy               | HEFA005 | Oesophagectomy with oesophagojejunostomy by thoraco laparotomy                                                                              |
| Oesophageal and gastric surgery | Oesophagectomy               | HEFA006 | Total oesophagectomy with oesophagocoloplasty by laparotomy and cervicotomy                                                                 |
| Oesophageal and gastric surgery | Oesophagectomy               | HEFA007 | Total oesophagectomy with oesophagocoloplasty by laparotomy, thoracotomy and cervicotomy                                                    |
| Oesophageal and gastric surgery | Oesophagectomy               | HEFA008 | Total oesophago laryngo pharyngectomy with pharyngogastric anastomosis                                                                      |
| Oesophageal and gastric surgery | Oesophagectomy               | HEFA009 | Open (thoracotomy and laparotomy) oesophagectomy and oesophagocoloplasty                                                                    |
| Oesophageal and gastric surgery | Oesophagectomy               | HEFA011 | Open (thoracotomy and laparotomy) oesophagectomy and oesophagojejunostomy                                                                   |
| Oesophageal and gastric surgery | Oesophagectomy               | HEFA012 | Open (thoracotomy and laparotomy) oesophagectomy and oesogastric anastomosis                                                                |
| Oesophageal and gastric surgery | Oesophagectomy               | HEFA013 | Oesophagectomy and oesogastric anastomosis by thoraco laparotomy                                                                            |
| Oesophageal and gastric surgery | Oesophagectomy               | HEFA016 | Oesophagectomy and oesophagocoloplasty by thoraco laparotomy                                                                                |
| Oesophageal and gastric surgery | Oesophagectomy               | HEFA017 | Open (laparotomy and cervicotomy) oesophago laryngo pharyngectomy and oesophagocoloplasty                                                   |
| Oesophageal and gastric surgery | Oesophagectomy               | HEFA018 | Open (thoracotomy and cervicotomy) oesophagectomy with laparoscopic gastric tube formation                                                  |
| Oesophageal and gastric surgery | Oesophagectomy               | HEPA006 | Open oesophago-cardiomyotomy without fundoplication                                                                                         |
| Oesophageal and gastric surgery | Oesophagectomy               | HEPC002 | Laparoscopic oesophago-cardiomyotomy without fundoplication                                                                                 |
| Oesophageal and gastric surgery | Oesophagectomy               | HEPC003 | Laparoscopic oesophago-cardiomyotomy with fundoplication                                                                                    |
| Oesophageal and gastric surgery | Gastrectomy                  | HFFA002 | Open antrectomy with gastroduodenostomy                                                                                                     |
| Oesophageal and gastric surgery | Gastrectomy                  | HFFA005 | Open total gastrectomy with oesophagojejunostomy                                                                                            |
| Oesophageal and gastric surgery | Gastrectomy                  | HFFA006 | Open antrectomy with gastrojejunostomy                                                                                                      |
| Oesophageal and gastric surgery | Gastrectomy                  | HFFA008 | Open partial degastrogastrectomy with gastrojejunostomy or with gastrojejunostomy                                                           |
| Oesophageal and gastric surgery | Gastrectomy                  | HFFA009 | Open gastric wedge resection                                                                                                                |
| Oesophageal and gastric surgery | Gastrectomy                  | HFFC001 | Laparoscopic gastric wedge resection                                                                                                        |
| Oesophageal and gastric surgery | Gastrectomy                  | HFFC002 | Laparoscopic antrectomy with gastrojejunostomy                                                                                              |
| Oesophageal and gastric surgery | Gastrectomy                  | HFFC012 | Laparoscopic antrectomy with gastroduodenostomy                                                                                             |
| Oesophageal and gastric surgery | Gastrectomy                  | HFFC017 | Laparoscopic total gastrectomy with oesophagojejunostomy                                                                                    |
| Oesophageal and gastric surgery | Gastrectomy                  | HFMA005 | Open completion gastrectomy with oesophagojejunostomy                                                                                       |
| Oesophageal and gastric surgery | Gastrojejunostomy            | HFCA004 | Open gastrojejunostomy                                                                                                                      |
| Oesophageal and gastric surgery | Gastrojejunostomy            | HFCC022 | Laparoscopic gastrojejunostomy                                                                                                              |
| Oesophageal and gastric surgery | Hiatal hernia repair         | LLMA006 | Open hiatal hernia repair without mesh                                                                                                      |
| Oesophageal and gastric surgery | Hiatal hernia repair         | LLMA010 | Open hiatal hernia repair with mesh                                                                                                         |
| Oesophageal and gastric surgery | Hiatal hernia repair         | LLMC004 | Laparoscopic hiatal hernia repair without mesh                                                                                              |
| Hepatopancreatic surgery        | Laparoscopic hepatectomy     | HLFC002 | Laparoscopic hepatic lobectomy                                                                                                              |
| Hepatopancreatic surgery        | Laparoscopic hepatectomy     | HLFC003 | Laparoscopic atypical liver resection                                                                                                       |
| Hepatopancreatic surgery        | Laparoscopic hepatectomy     | HLFC004 | Laparoscopic liver monosegmentectomy                                                                                                        |

|                          |                                       |         |                                                                                                         |
|--------------------------|---------------------------------------|---------|---------------------------------------------------------------------------------------------------------|
| Hepatopancreatic surgery | Laparoscopic hepatectomy              | HLFC027 | Laparoscopic liver bisegmentectomy                                                                      |
| Hepatopancreatic surgery | Laparoscopic hepatectomy              | HLFC032 | Laparoscopic liver trisegmentectomy                                                                     |
| Hepatopancreatic surgery | Laparoscopic hepatectomy              | HLFC037 | Laparoscopic left hepatectomy                                                                           |
| Hepatopancreatic surgery | Laparoscopic pancreatectomy           | HNFC001 | Laparoscopic pancreatic enucleation                                                                     |
| Hepatopancreatic surgery | Laparoscopic pancreatectomy           | HNFC002 | Laparoscopic left pancreatectomy with splenectomy                                                       |
| Hepatopancreatic surgery | Laparoscopic pancreatectomy           | HNFC028 | Laparoscopic left pancreatectomy with splenic preservation                                              |
| Hepatopancreatic surgery | Open hepatectomy                      | HLFA004 | Open extended right hepatectomy with segment 1 resection                                                |
| Hepatopancreatic surgery | Open hepatectomy                      | HLFA005 | Open right hepatic lobectomy                                                                            |
| Hepatopancreatic surgery | Open hepatectomy                      | HLFA006 | Open liver trisegmentectomy                                                                             |
| Hepatopancreatic surgery | Open hepatectomy                      | HLFA007 | Open extended left hepatectomy with segment 1 resection                                                 |
| Hepatopancreatic surgery | Open hepatectomy                      | HLFA009 | Open liver bisegmentectomy                                                                              |
| Hepatopancreatic surgery | Open hepatectomy                      | HLFA010 | Open central hepatectomy                                                                                |
| Hepatopancreatic surgery | Open hepatectomy                      | HLFA011 | Open left hepatic lobectomy                                                                             |
| Hepatopancreatic surgery | Open hepatectomy                      | HLFA017 | Open right hepatectomy                                                                                  |
| Hepatopancreatic surgery | Open hepatectomy                      | HLFA018 | Open left hepatectomy                                                                                   |
| Hepatopancreatic surgery | Open hepatectomy                      | HLFA019 | Open atypical liver resection                                                                           |
| Hepatopancreatic surgery | Open hepatectomy                      | HLFA020 | Open liver monosegmentectomy                                                                            |
| Hepatopancreatic surgery | Open hepatectomy                      | HMFA009 | Open bile duct resection with hepatico jejunostomy                                                      |
| Hepatopancreatic surgery | Open hepatectomy                      | HMFA010 | Open resection of extra pancreatic and common bile duct with hepatico jejunostomy                       |
| Hepatopancreatic surgery | Open pancreatectomy                   | HNFA001 | Open central pancreatectomy with pancreatico-enteric anastomosis                                        |
| Hepatopancreatic surgery | Open pancreatectomy                   | HNFA002 | Open left pancreatectomy with splenic preservation and pancreaticogastrostomy or pancreaticojejunostomy |
| Hepatopancreatic surgery | Open pancreatectomy                   | HNFA004 | Open total pancreaticoduodenectomy with splenectomy                                                     |
| Hepatopancreatic surgery | Open pancreatectomy                   | HNFA005 | Open pancreatic enucleation                                                                             |
| Hepatopancreatic surgery | Open pancreatectomy                   | HNFA006 | Open duodenum-preserving total or subtotal pancreatectomy with splenectomy                              |
| Hepatopancreatic surgery | Open pancreatectomy                   | HNFA007 | Open pancreaticoduodenectomy                                                                            |
| Hepatopancreatic surgery | Open pancreatectomy                   | HNFA008 | Open left pancreatectomy with splenic preservation                                                      |
| Hepatopancreatic surgery | Open pancreatectomy                   | HNFA010 | Pancreaticojejunostomy or pancreaticogastrostomy                                                        |
| Hepatopancreatic surgery | Open pancreatectomy                   | HNFA011 | Open duodenum-preserving total or subtotal pancreatectomy with splenic preservation                     |
| Hepatopancreatic surgery | Open pancreatectomy                   | HNFA013 | Open left pancreatectomy with splenectomy                                                               |
| Hernia repair            | Laparoscopic incisional hernia repair | LMMC015 | Laparoscopic incisional hernia repair with mesh                                                         |
| Hernia repair            | Laparoscopic inguinal hernia repair   | LMMC002 | Laparoscopic unilateral inguinal hernia repair with mesh                                                |
| Hernia repair            | Laparoscopic inguinal hernia repair   | LMMC020 | Laparoscopic umbilical hernia repair with mesh after age 16                                             |
| Hernia repair            | Open direct hernia repair             | LMMA006 | Open umbilical hernia repair with mesh after age 16                                                     |
| Hernia repair            | Open direct hernia repair             | LMMA009 | Open umbilical hernia repair without mesh after age 16                                                  |
| Hernia repair            | Open incisional hernia repair         | LMMA004 | Open incisional hernia repair with mesh                                                                 |
| Hernia repair            | Open incisional hernia repair         | LMMA010 | Open incisional hernia repair without mesh                                                              |
| Hernia repair            | Open inguinal hernia repair           | LMMA001 | Open bilateral inguinal hernia repair with mesh                                                         |
| Hernia repair            | Open inguinal hernia repair           | LMMA011 | Open femoral hernia repair                                                                              |
| Hernia repair            | Open inguinal hernia repair           | LMMA012 | Open unilateral inguinal hernia repair with mesh                                                        |
| Hernia repair            | Open inguinal hernia repair           | LMMA016 | Open unilateral inguinal hernia repair without mesh under local anaesthesia                             |
| Hernia repair            | Open inguinal hernia repair           | LMMA017 | Open unilateral inguinal hernia repair without mesh under general anaesthesia                           |
| Hernia repair            | Open inguinal hernia repair           | LMMA018 | Open bilateral inguinal hernia repair without mesh under general anaesthesia                            |

## Appendix. Components of Control Chart–Based Program

A tutorial to reproduce the control chart program with slideshows, videos and logbook is available at: <http://shewhart.univ-lyon1.fr/>.

Key elements on how to develop and interpret a p-chart for clinical practice and how to successfully integrate this tool within a comprehensive approach can also be found online at: <https://academic.oup.com/intqhc/article/22/5/402/1786749>. This includes an open access tutorial accompanied with supplementary material and tools containing fictive data, parameter calculations and chart plotting, so that the reader can easily replicate the method.

Sample slideshow with set of control charts on the colorectal surgery used during team meetings.

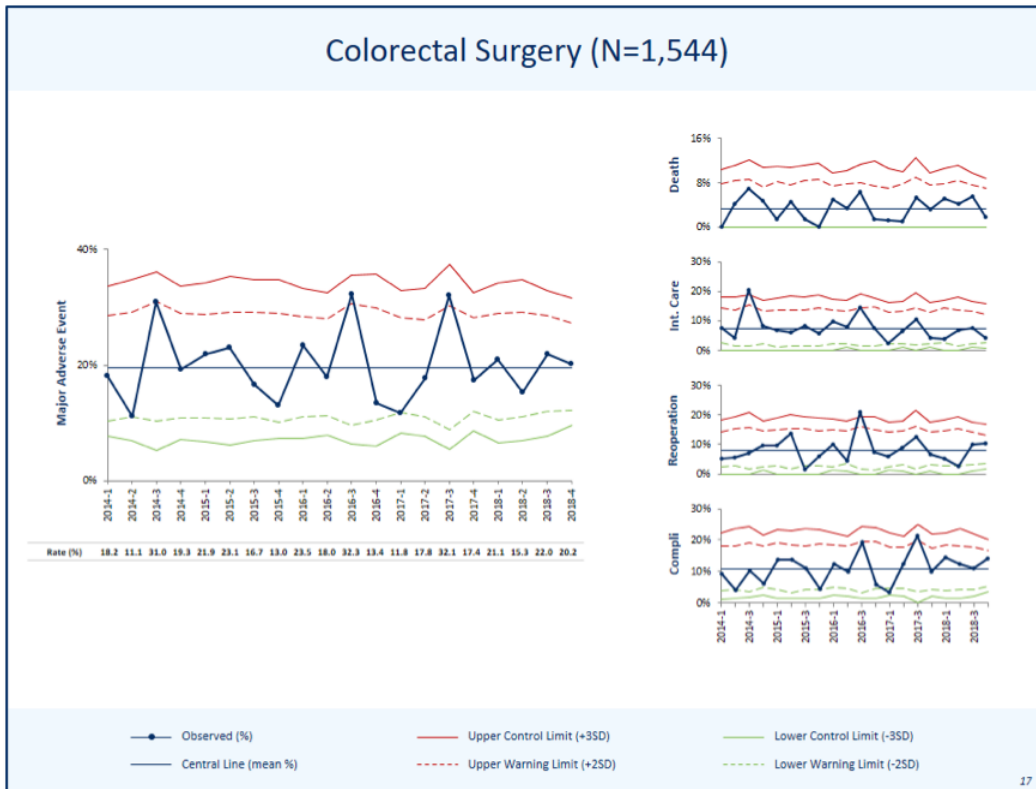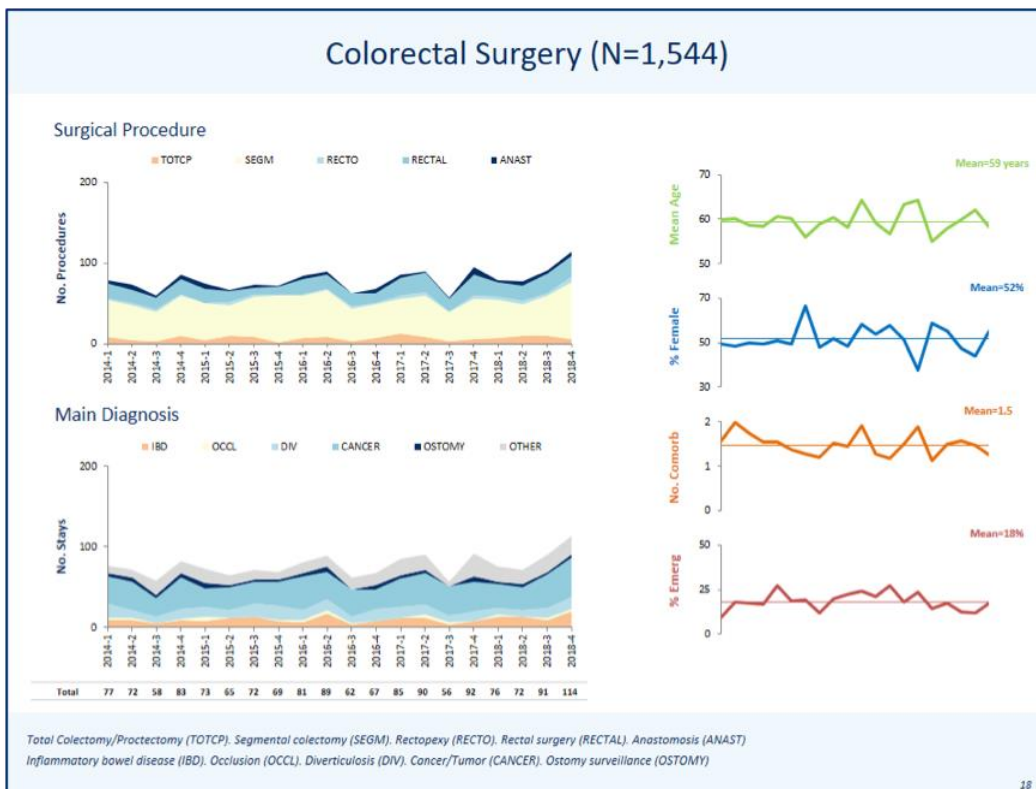

## Appendix. Compliance with Control Chart–Based Program Implementation

Compliance of individual hospitals with program implementation.

| Intervention components         | Implementation score (N = 20 hospitals)       | Details                                                                                                                                                                                                                                                                                                                                                                            |
|---------------------------------|-----------------------------------------------|------------------------------------------------------------------------------------------------------------------------------------------------------------------------------------------------------------------------------------------------------------------------------------------------------------------------------------------------------------------------------------|
| Duos formation                  | Duo formed with a surgeon: 100%               | <ul style="list-style-type: none"> <li>◦ Duos not with 2 surgeons: 60%</li> <li>◦ Turnover within duo during the study: 20%</li> </ul>                                                                                                                                                                                                                                             |
| Training sessions participation | Participation in all 3 training sessions: 90% | Training sessions: 1   2   3<br><ul style="list-style-type: none"> <li>◦ Number of hospitals: 20   20   18</li> <li>◦ Number of participants: 37   36   33</li> <li>◦ Satisfaction score (/10): 8.2   8.0   8.7</li> <li>◦ Investment score (/10): 8.9   8.3   8.0</li> </ul>                                                                                                      |
| Logbook maintenance             | Logbook updated until the end: 45%            | <ul style="list-style-type: none"> <li>◦ Mean number of changes recorded per hospital: 19.5</li> <li>◦ Type of changes (n = 390):               <ul style="list-style-type: none"> <li>- Patient: 10%</li> <li>- Healthcare worker: 18%</li> <li>- Equipment: 10%</li> <li>- Organization: 31%</li> <li>- Clinical practice: 9%</li> <li>- Unspecified: 22%</li> </ul> </li> </ul> |
| Poster display                  | 8 posters displayed in operating room: 35%    | <ul style="list-style-type: none"> <li>◦ Posters transmitted: 100%</li> <li>◦ Mean number of posters displayed per hospital: 5.0</li> <li>◦ Selfie of duo with the first poster displayed: 100%</li> </ul>                                                                                                                                                                         |
| Control chart team meetings     | 8 team meetings held: 60%                     | <ul style="list-style-type: none"> <li>◦ Slideshows transmitted: 100%</li> <li>◦ Mean number of team meeting per hospital: 6.9</li> <li>◦ Mean duration of team meeting (min): 53.9</li> <li>◦ Mean number of participants per team meeting: 9.3</li> <li>◦ Selfie of team meeting: 50%</li> </ul>                                                                                 |
| Improvement plan implementation | At least one improvement plan tested: 95%     | <ul style="list-style-type: none"> <li>◦ Mean number of improvement plans tested per hospital: 3.1</li> <li>◦ Type of improvement actions (n = 61):               <ul style="list-style-type: none"> <li>- Patient: 6%</li> <li>- Healthcare worker: 13%</li> <li>- Equipment: 5%</li> <li>- Organization: 70%</li> <li>- Clinical practice: 6%</li> </ul> </li> </ul>             |

Compliance of each hospital with program implementation was measured based on a previously designed six-items scoring: duo formed with a surgeon, participation in all 3 training sessions, logbook updated over 2 years until the end, posters displayed in operating room every quarter, team meetings held for interpreting control charts every quarter, at least one concrete action tested for care improvement.

| Hospital Number                          | 1    | 2 | 3 | 4 | 5 | 6 | 7 | 8 | 9 | 10       | 11 | 12 | 13 | 14 | 15 | 16 | 17 | 18 | 19   | 20 | Total |
|------------------------------------------|------|---|---|---|---|---|---|---|---|----------|----|----|----|----|----|----|----|----|------|----|-------|
| Duo formed with a surgeon                | 1    | 1 | 1 | 1 | 1 | 1 | 1 | 1 | 1 | 1        | 1  | 1  | 1  | 1  | 1  | 1  | 1  | 1  | 1    | 1  | 20    |
| Participation in all 3 training sessions | 1    | 1 | 1 | 1 | 1 | 1 | 1 | 1 | 1 | 1        | 1  | 1  | 1  | 1  | 1  | 1  | 1  | 1  | 1    |    | 18    |
| Logbook updated until the end            | 1    | 1 | 1 | 1 | 1 | 1 | 1 | 1 | 1 | 1        |    |    |    |    |    |    |    |    |      |    | 9     |
| 8 posters displayed in operating room    | 1    | 1 | 1 | 1 | 1 |   |   |   | 1 |          |    |    |    |    |    |    |    | 1  |      |    | 7     |
| 8 team meetings held                     | 1    | 1 | 1 | 1 | 1 | 1 | 1 | 1 | 1 |          | 1  | 1  | 1  |    |    |    |    |    |      |    | 12    |
| At least one improvement action tested   | 1    | 1 | 1 | 1 | 1 | 1 | 1 | 1 | 1 | 1        | 1  | 1  | 1  | 1  | 1  | 1  | 1  | 1  | 1    |    | 19    |
| Implementation Score                     | 6    | 6 | 6 | 6 | 6 | 5 | 5 | 5 | 5 | 4        | 4  | 4  | 4  | 3  | 3  | 3  | 3  | 3  | 2    | 2  | 4.3   |
| Compliance degree                        | High |   |   |   |   |   |   |   |   | Moderate |    |    |    |    |    |    |    |    | Poor |    |       |

**Table S1. Patient Characteristics Across Operative Procedures by Study Group**

| <b>Operative procedure</b>                  | <b>Total<br/>(N = 155 362)</b> | <b>Intervention<br/>(n = 75 047)</b> | <b>Control<br/>(n = 80 315)</b> |
|---------------------------------------------|--------------------------------|--------------------------------------|---------------------------------|
| <b>Hernia repair</b>                        | <b>36 567</b>                  | <b>17 617</b>                        | <b>18 950</b>                   |
| Main diagnosis                              |                                |                                      |                                 |
| Uncomplicated inguinal or incisional hernia | 29 046 (79.4)                  | 14 126 (80.2)                        | 14 920 (78.7)                   |
| Complicated inguinal or incisional hernia   | 4803 (13.1)                    | 2405 (13.7)                          | 2398 (12.7)                     |
| Other                                       | 2718 (7.4)                     | 1086 (6.2)                           | 1632 (8.6)                      |
| Surgical procedure                          |                                |                                      |                                 |
| Open inguinal hernia repair                 | 11 897 (32.5)                  | 5608 (31.8)                          | 6289 (33.2)                     |
| Open incisional hernia repair               | 11 604 (31.7)                  | 4954 (28.1)                          | 6650 (35.1)                     |
| Open direct hernia repair                   | 6631 (18.1)                    | 3383 (19.2)                          | 3248 (17.1)                     |
| Laparoscopic inguinal hernia repair         | 4740 (13.0)                    | 2803 (15.9)                          | 1937 (10.2)                     |
| Laparoscopic incisional hernia repair       | 1695 (4.6)                     | 869 (4.9)                            | 826 (4.4)                       |
| <b>Colorectal surgery</b>                   | <b>32 919</b>                  | <b>15 830</b>                        | <b>17 089</b>                   |
| Main diagnosis                              |                                |                                      |                                 |
| Cancer                                      | 15 960 (48.5)                  | 8300 (52.4)                          | 7660 (44.8)                     |
| Other                                       | 7437 (22.6)                    | 3197 (20.2)                          | 4240 (24.8)                     |
| Diverticulosis                              | 4749 (14.4)                    | 2103 (13.3)                          | 2646 (15.5)                     |
| Ostomy surveillance                         | 2448 (7.4)                     | 1034 (6.5)                           | 1414 (8.3)                      |
| Inflammatory bowel disease                  | 1552 (4.7)                     | 760 (4.8)                            | 792 (4.6)                       |
| Bowel occlusion                             | 773 (2.3)                      | 436 (2.8)                            | 337 (2.0)                       |
| Surgical procedure                          |                                |                                      |                                 |
| Segmental colectomy                         | 17 899 (54.4)                  | 9038 (57.1)                          | 8861 (51.9)                     |
| Rectal surgery                              | 7100 (21.6)                    | 3529 (22.3)                          | 3571 (20.9)                     |
| Rectopexy                                   | 3474 (10.6)                    | 1213 (7.7)                           | 2261 (13.2)                     |
| Ostomy and Hartman procedure reversal       | 2345 (7.1)                     | 1002 (6.3)                           | 1343 (7.9)                      |
| Total colectomy or coloproctectomy          | 2101 (6.4)                     | 1048 (6.6)                           | 1053 (6.2)                      |
| <b>Cholecystectomy</b>                      | <b>30 765</b>                  | <b>14 872</b>                        | <b>15 893</b>                   |
| Main diagnosis                              |                                |                                      |                                 |
| Other cholecystitis                         | 11 613 (37.7)                  | 5366 (36.1)                          | 6247 (39.3)                     |
| Acute cholecystitis                         | 9511 (30.9)                    | 5077 (34.1)                          | 4434 (27.9)                     |
| Gallstone without cholecystitis             | 6299 (20.5)                    | 2921 (19.6)                          | 3378 (21.3)                     |
| Other                                       | 2744 (8.9)                     | 1236 (8.3)                           | 1508 (9.5)                      |
| Gallbladder cancer                          | 598 (1.9)                      | 272 (1.8)                            | 326 (2.1)                       |
| Surgical procedure                          |                                |                                      |                                 |
| Laparoscopic cholecystectomy                | 27 668 (89.9)                  | 13 527 (91.0)                        | 14 141 (89.0)                   |
| Open cholecystectomy                        | 3097 (10.1)                    | 1345 (9.0)                           | 1752 (11.0)                     |
| <b>Bariatric surgery</b>                    | <b>18 553</b>                  | <b>9181</b>                          | <b>9372</b>                     |
| Main diagnosis                              |                                |                                      |                                 |
| Body mass index 40-50 kg/m <sup>2</sup>     | 9993 (53.9)                    | 5155 (56.1)                          | 4838 (51.6)                     |
| Body mass index 30-40 kg/m <sup>2</sup>     | 5135 (27.7)                    | 2360 (25.7)                          | 2775 (29.6)                     |
| Body mass index ≥50 kg/m <sup>2</sup>       | 2398 (12.9)                    | 1209 (13.2)                          | 1189 (12.7)                     |
| Other                                       | 1027 (5.5)                     | 457 (5.0)                            | 570 (6.1)                       |
| Surgical procedure                          |                                |                                      |                                 |
| Sleeve gastrectomy                          | 10 211 (55.0)                  | 5005 (54.5)                          | 5206 (55.5)                     |
| Roux-en-Y gastric bypass                    | 7211 (38.9)                    | 3638 (39.6)                          | 3573 (38.1)                     |
| Gastric banding                             | 1131 (6.1)                     | 538 (5.9)                            | 593 (6.3)                       |
| <b>Appendectomy</b>                         | <b>17 572</b>                  | <b>9718</b>                          | <b>7854</b>                     |
| Main diagnosis                              |                                |                                      |                                 |
| Uncomplicated appendicitis                  | 9086 (51.7)                    | 5013 (51.6)                          | 4073 (51.9)                     |
| Complicated appendicitis                    | 7278 (41.4)                    | 4071 (41.9)                          | 3207 (40.8)                     |
| Other                                       | 1208 (6.9)                     | 634 (6.5)                            | 574 (7.3)                       |
| Surgical procedure                          |                                |                                      |                                 |
| Laparoscopic appendectomy                   | 15 826 (90.1)                  | 8867 (91.2)                          | 6959 (88.6)                     |
| Open appendectomy                           | 1746 (9.9)                     | 851 (8.8)                            | 895 (11.4)                      |
| <b>Hepatopancreatic surgery</b>             | <b>10 648</b>                  | <b>4585</b>                          | <b>6063</b>                     |
| Main diagnosis                              |                                |                                      |                                 |
| Liver cancer/tumour                         | 2804 (26.3)                    | 1249 (27.2)                          | 1555 (25.6)                     |
| Liver metastasis                            | 2761 (25.9)                    | 1142 (24.9)                          | 1619 (26.7)                     |

|                                        |             |             |             |
|----------------------------------------|-------------|-------------|-------------|
| Pancreatic cancer/tumour               | 2733 (25.7) | 1224 (26.7) | 1509 (24.9) |
| Other cancer/tumour                    | 1314 (12.3) | 548 (12.0)  | 766 (12.6)  |
| Other                                  | 1036 (9.7)  | 422 (9.2)   | 614 (10.1)  |
| <b>Surgical procedure</b>              |             |             |             |
| Open hepatectomy                       | 4948 (46.5) | 2060 (44.9) | 2888 (47.6) |
| Open pancreatectomy                    | 3653 (34.3) | 1618 (35.3) | 2035 (33.6) |
| Laparoscopic hepatectomy               | 1595 (15.0) | 688 (15.0)  | 907 (15.0)  |
| Laparoscopic pancreatectomy            | 452 (4.2)   | 219 (4.8)   | 233 (3.8)   |
| <b>Oesophageal and gastric surgery</b> | <b>8338</b> | <b>3244</b> | <b>5094</b> |
| <b>Main diagnosis</b>                  |             |             |             |
| Cancer/tumour                          | 3313 (39.7) | 1498 (46.2) | 1815 (35.6) |
| Other                                  | 2434 (29.2) | 651 (20.1)  | 1783 (35.0) |
| Diaphragmatic hernia                   | 1504 (18.0) | 635 (19.6)  | 869 (17.1)  |
| Gastric reflux                         | 928 (11.1)  | 382 (11.8)  | 546 (10.7)  |
| Inflammation/ulcer                     | 159 (1.9)   | 78 (2.4)    | 81 (1.6)    |
| <b>Surgical procedure</b>              |             |             |             |
| Gastrectomy                            | 2900 (34.8) | 1318 (40.6) | 1582 (31.1) |
| Hiatal hernia repair                   | 2035 (24.4) | 561 (17.3)  | 1474 (28.9) |
| Oesophagectomy                         | 1455 (17.5) | 559 (17.2)  | 896 (17.6)  |
| Fundoplication                         | 1366 (16.4) | 570 (17.6)  | 796 (15.6)  |
| Gastrojejunostomy                      | 582 (7.0)   | 236 (7.3)   | 346 (6.8)   |

Average numbers are shown in each group. Data relative to pre-implementation period (January 1, 2014 to December 31, 2015) and implementation period (January 1, 2017 to December 31, 2018) were pooled in intervention and control hospitals. Numbers may not sum to 100 because of rounding.



**Table S2. Hospital and Patient Characteristics by Study Group and Period**

| Characteristics                                  | Intervention Group |                   | Control Group      |                   |
|--------------------------------------------------|--------------------|-------------------|--------------------|-------------------|
|                                                  | Pre-implementation | Implementation    | Pre-implementation | Implementation    |
| <b>Hospitals</b>                                 | <b>(n=20)</b>      | <b>(n=20)</b>     | <b>(n=20)</b>      | <b>(n=20)</b>     |
| Median (range) volume of digestive tract surgery | 1768 (1143-2914)   | 1728 (1131-2937)  | 2051 (1161-3722)   | 1921 (931-3489)   |
| Median (range) rate of ambulatory procedures     | 17.9 (7.2-49.7)    | 25.4 (9.7-52.6)   | 14.2 (5.6-37.6)    | 25.1 (8.8-40.6)   |
| <b>Patients</b>                                  | <b>(n=37 579)</b>  | <b>(n=37 468)</b> | <b>(n=41 548)</b>  | <b>(n=38 767)</b> |
| Mean (SD) age (years)                            | 56.6 (18.6)        | 56.7 (18.5)       | 56.5 (18.2)        | 57.3 (18.2)       |
| Women                                            | 19 480 (51.8)      | 19 373 (51.7)     | 22 202 (53.4)      | 20 202 (52.1)     |
| Median household income quartiles (€):           |                    |                   |                    |                   |
| Very low (11 727-18 926)                         | 7251 (19.3)        | 7268 (19.4)       | 12 196 (29.4)      | 11 609 (29.9)     |
| Low (18 927-20 206)                              | 7903 (21.0)        | 8043 (21.5)       | 12 398 (29.8)      | 11 214 (28.9)     |
| High (20 209-22 332)                             | 9833 (26.2)        | 9925 (26.5)       | 9722 (23.4)        | 9296 (24.0)       |
| Very high (22 332-43 350)                        | 12 592 (33.5)      | 12 232 (32.6)     | 7232 (17.4)        | 6648 (17.1)       |
| Elixhauser comorbidities*                        |                    |                   |                    |                   |
| 0                                                | 18 794 (50.0)      | 18 025 (48.1)     | 20 349 (49.0)      | 19 484 (50.3)     |
| 1                                                | 8488 (22.6)        | 8579 (22.9)       | 9918 (23.9)        | 8612 (22.2)       |
| 2                                                | 4811 (12.8)        | 5072 (13.5)       | 5625 (13.5)        | 5176 (13.4)       |
| ≥3                                               | 5486 (14.6)        | 5792 (15.5)       | 5656 (13.6)        | 5495 (14.2)       |
| Emergency admission                              | 9780 (26.0)        | 9977 (26.6)       | 8325 (20.0)        | 8222 (21.2)       |
| Surgical procedure during July/August            | 5245 (14.0)        | 5277 (14.1)       | 5819 (14.0)        | 5419 (14.0)       |
| Operative procedure:                             |                    |                   |                    |                   |
| Hernia repair                                    | 9300 (24.7)        | 8317 (22.2)       | 10 041 (24.2)      | 8909 (23.0)       |
| Colorectal                                       | 7636 (20.3)        | 8194 (21.9)       | 8558 (20.6)        | 8531 (22.0)       |
| Cholecystectomy                                  | 8002 (21.3)        | 6870 (18.3)       | 8773 (21.1)        | 7120 (18.4)       |
| Bariatric                                        | 4008 (10.7)        | 5173 (13.8)       | 4755 (11.4)        | 4617 (11.9)       |
| Appendectomy                                     | 4815 (12.8)        | 4903 (13.1)       | 3862 (9.3)         | 3992 (10.3)       |
| Hepatopancreatic                                 | 2234 (5.9)         | 2351 (6.3)        | 2986 (7.2)         | 3077 (7.9)        |
| Oesophageal and gastric                          | 1584 (4.2)         | 1660 (4.4)        | 2573 (6.2)         | 2521 (6.5)        |

Values are numbers (percentages) unless stated otherwise. Numbers are shown in pre-implementation period (January 1, 2014 to December 31, 2015) and implementation period (January 1, 2017 to December 31, 2018), for each group (intervention and control hospitals). SD, standard deviation. Numbers may not sum to 100 because of rounding. Details regarding additional patient characteristics by operative procedure are provided in table S3.

\*Congestive heart failure, cardiac arrhythmias, valvular disease, pulmonary circulation disorders, peripheral vascular disorders, hypertension uncomplicated/complicated, paralysis, other neurological disorders, chronic pulmonary disease, diabetes uncomplicated/complicated, hypothyroidism, renal failure, liver disease, peptic ulcer disease excluding bleeding, AIDS/HIV, lymphoma, metastatic cancer, solid tumor without metastasis, rheumatoid arthritis/collagen vascular diseases, coagulopathy, obesity, weight loss, fluid and electrolyte disorders, blood loss anemia, deficiency anemia, alcohol abuse, drug abuse, psychoses, and depression.

**Table S3. Patient Characteristics Across Operative Procedures by Study Group and Period**

| Operative procedure                         | Intervention Group               |                              | Control Group                    |                              |
|---------------------------------------------|----------------------------------|------------------------------|----------------------------------|------------------------------|
|                                             | Pre-implementation<br>(n=37 579) | Implementation<br>(n=37 468) | Pre-implementation<br>(n=41 548) | Implementation<br>(n=38 767) |
| <b>Hernia repair</b>                        | <b>(n=9300)</b>                  | <b>(n=8317)</b>              | <b>(n=10 041)</b>                | <b>(n=8909)</b>              |
| Main diagnosis                              |                                  |                              |                                  |                              |
| Uncomplicated inguinal or incisional hernia | 7596 (81.7)                      | 6530 (78.5)                  | 8053 (80.2)                      | 6867 (77.1)                  |
| Complicated inguinal or incisional hernia   | 1192 (12.8)                      | 1213 (14.6)                  | 1248 (12.4)                      | 1150 (12.9)                  |
| Other                                       | 512 (5.5)                        | 574 (6.9)                    | 740 (7.4)                        | 892 (10.0)                   |
| Surgical procedure                          |                                  |                              |                                  |                              |
| Open inguinal hernia repair                 | 3012 (32.4)                      | 2596 (31.2)                  | 3423 (34.1)                      | 2866 (32.2)                  |
| Open incisional hernia repair               | 2479 (26.7)                      | 2475 (29.8)                  | 3431 (34.2)                      | 3219 (36.1)                  |
| Open direct hernia repair                   | 1880 (20.2)                      | 1503 (18.1)                  | 1719 (17.1)                      | 1529 (17.2)                  |
| Laparoscopic inguinal hernia repair         | 1505 (16.2)                      | 1298 (15.6)                  | 1103 (11.0)                      | 834 (9.4)                    |
| Laparoscopic incisional hernia repair       | 424 (4.6)                        | 445 (5.4)                    | 365 (3.6)                        | 461 (5.2)                    |
| <b>Colorectal surgery</b>                   | <b>(n=7636)</b>                  | <b>(n=8194)</b>              | <b>(n=8558)</b>                  | <b>(n=8531)</b>              |
| Main diagnosis                              |                                  |                              |                                  |                              |
| Cancer                                      | 3896 (51.0)                      | 4404 (53.7)                  | 3786 (44.2)                      | 3874 (45.4)                  |
| Other                                       | 1558 (20.4)                      | 1639 (20.0)                  | 2178 (25.4)                      | 2062 (24.2)                  |
| Diverticulosis                              | 1088 (14.2)                      | 1015 (12.4)                  | 1372 (16.0)                      | 1274 (14.9)                  |
| Ostomy surveillance                         | 466 (6.1)                        | 568 (6.9)                    | 701 (8.2)                        | 713 (8.4)                    |
| Inflammatory bowel disease                  | 402 (5.3)                        | 358 (4.4)                    | 363 (4.2)                        | 429 (5.0)                    |
| Bowel occlusion                             | 226 (3.0)                        | 210 (2.6)                    | 158 (1.8)                        | 179 (2.1)                    |
| Surgical procedure                          |                                  |                              |                                  |                              |
| Segmental colectomy                         | 4364 (57.2)                      | 4674 (57.0)                  | 4401 (51.4)                      | 4460 (52.3)                  |
| Rectal surgery                              | 1692 (22.2)                      | 1837 (22.4)                  | 1766 (20.6)                      | 1805 (21.2)                  |
| Rectopexy                                   | 583 (7.6)                        | 630 (7.7)                    | 1213 (14.2)                      | 1048 (12.3)                  |
| Ostomy and Hartman procedure reversal       | 460 (6.0)                        | 542 (6.6)                    | 648 (7.6)                        | 695 (8.1)                    |
| Total colectomy or coloproctectomy          | 537 (7.0)                        | 511 (6.2)                    | 530 (6.2)                        | 523 (6.1)                    |
| <b>Cholecystectomy</b>                      | <b>(n=8002)</b>                  | <b>(n=6870)</b>              | <b>(n=8773)</b>                  | <b>(n=7120)</b>              |
| Main diagnosis                              |                                  |                              |                                  |                              |
| Other cholecystitis                         | 2961 (37.0)                      | 2405 (35.0)                  | 3174 (36.2)                      | 3073 (43.2)                  |
| Acute cholecystitis                         | 2585 (32.3)                      | 2492 (36.3)                  | 2462 (28.1)                      | 1972 (27.7)                  |
| Gallstone without cholecystitis             | 1731 (21.6)                      | 1190 (17.3)                  | 2174 (24.8)                      | 1204 (16.9)                  |
| Other                                       | 597 (7.5)                        | 639 (9.3)                    | 803 (9.2)                        | 705 (9.9)                    |
| Gallbladder cancer                          | 128 (1.6)                        | 144 (2.1)                    | 160 (1.8)                        | 166 (2.3)                    |
| Surgical procedure                          |                                  |                              |                                  |                              |
| Laparoscopic cholecystectomy                | 7296 (91.2)                      | 6231 (90.7)                  | 7763 (88.5)                      | 6378 (89.6)                  |
| Open cholecystectomy                        | 706 (8.8)                        | 639 (9.3)                    | 1010 (11.5)                      | 742 (10.4)                   |
| <b>Bariatric surgery</b>                    | <b>(n=4008)</b>                  | <b>(n=5173)</b>              | <b>(n=4755)</b>                  | <b>(n=4617)</b>              |
| Main diagnosis                              |                                  |                              |                                  |                              |
| Body mass index 40-50 kg/m <sup>2</sup>     | 2280 (56.9)                      | 2875 (55.6)                  | 2499 (52.6)                      | 2339 (50.7)                  |
| Body mass index 30-40 kg/m <sup>2</sup>     | 950 (23.7)                       | 1410 (27.3)                  | 1272 (26.8)                      | 1503 (32.6)                  |
| Body mass index ≥50 kg/m <sup>2</sup>       | 568 (14.2)                       | 641 (12.4)                   | 632 (13.3)                       | 557 (12.1)                   |
| Other                                       | 210 (5.2)                        | 247 (4.8)                    | 352 (7.4)                        | 218 (4.7)                    |
| Surgical procedure                          |                                  |                              |                                  |                              |
| Sleeve gastrectomy                          | 2105 (52.5)                      | 2900 (56.1)                  | 2518 (53.0)                      | 2688 (58.2)                  |
| Roux-en-Y gastric bypass                    | 1637 (40.8)                      | 2001 (38.7)                  | 1835 (38.6)                      | 1738 (37.6)                  |
| Gastric banding                             | 266 (6.6)                        | 272 (5.3)                    | 402 (8.5)                        | 191 (4.1)                    |
| <b>Appendectomy</b>                         | <b>(n=4815)</b>                  | <b>(n=4903)</b>              | <b>(n=3862)</b>                  | <b>(n=3992)</b>              |
| Main diagnosis                              |                                  |                              |                                  |                              |
| Uncomplicated appendicitis                  | 2471 (51.3)                      | 2542 (51.8)                  | 1926 (49.9)                      | 2147 (53.8)                  |
| Complicated appendicitis                    | 2027 (42.1)                      | 2044 (41.7)                  | 1632 (42.3)                      | 1575 (39.5)                  |
| Other                                       | 317 (6.6)                        | 317 (6.5)                    | 304 (7.9)                        | 270 (6.8)                    |
| Surgical procedure                          |                                  |                              |                                  |                              |
| Laparoscopic appendectomy                   | 4329 (89.9)                      | 4538 (92.6)                  | 3376 (87.4)                      | 3583 (89.8)                  |
| Open appendectomy                           | 486 (10.1)                       | 365 (7.4)                    | 486 (12.6)                       | 409 (10.2)                   |
| <b>Hepatopancreatic surgery</b>             | <b>(n=2234)</b>                  | <b>(n=2351)</b>              | <b>(n=2986)</b>                  | <b>(n=3077)</b>              |
| Main diagnosis                              |                                  |                              |                                  |                              |
| Liver cancer/tumour                         | 599 (26.8)                       | 650 (27.6)                   | 776 (26.0)                       | 779 (25.3)                   |

|                                        |                 |                 |                 |                 |
|----------------------------------------|-----------------|-----------------|-----------------|-----------------|
| Liver metastasis                       | 526 (23.5)      | 616 (26.2)      | 798 (26.7)      | 821 (26.7)      |
| Pancreatic cancer/tumour               | 621 (27.8)      | 603 (25.6)      | 747 (25.0)      | 762 (24.8)      |
| Other cancer/tumour                    | 271 (12.1)      | 277 (11.8)      | 350 (11.7)      | 416 (13.5)      |
| Other                                  | 217 (9.7)       | 205 (8.7)       | 315 (10.5)      | 299 (9.7)       |
| <b>Surgical procedure</b>              |                 |                 |                 |                 |
| Open hepatectomy                       | 1010 (45.2)     | 1050 (44.7)     | 1483 (49.7)     | 1405 (45.7)     |
| Open pancreatectomy                    | 805 (36.0)      | 813 (34.6)      | 999 (33.5)      | 1036 (33.7)     |
| Laparoscopic hepatectomy               | 316 (14.1)      | 372 (15.8)      | 415 (13.9)      | 492 (16.0)      |
| Laparoscopic pancreatectomy            | 103 (4.6)       | 116 (4.9)       | 89 (3.0)        | 144 (4.7)       |
| <b>Oesophageal and gastric surgery</b> | <b>(n=1584)</b> | <b>(n=1660)</b> | <b>(n=2573)</b> | <b>(n=2521)</b> |
| <b>Main diagnosis</b>                  |                 |                 |                 |                 |
| Cancer/tumour                          | 755 (47.7)      | 743 (44.8)      | 942 (36.6)      | 873 (34.6)      |
| Other                                  | 266 (16.8)      | 385 (23.2)      | 879 (34.2)      | 904 (35.9)      |
| Diaphragmatic hernia                   | 301 (19.0)      | 334 (20.1)      | 413 (16.1)      | 456 (18.1)      |
| Gastric reflux                         | 214 (13.5)      | 168 (10.1)      | 294 (11.4)      | 252 (10.0)      |
| Inflammation/ulcer                     | 48 (3.0)        | 30 (1.8)        | 45 (1.7)        | 36 (1.4)        |
| <b>Surgical procedure</b>              |                 |                 |                 |                 |
| Gastrectomy                            | 631 (39.8)      | 687 (41.4)      | 839 (32.6)      | 743 (29.5)      |
| Hiatal hernia repair                   | 262 (16.5)      | 299 (18.0)      | 625 (24.3)      | 849 (33.7)      |
| Oesophagectomy                         | 301 (19.0)      | 258 (15.5)      | 474 (18.4)      | 422 (16.7)      |
| Fundoplication                         | 273 (17.2)      | 297 (17.9)      | 450 (17.5)      | 346 (13.7)      |
| Gastrojejunostomy                      | 117 (7.4)       | 119 (7.2)       | 185 (7.2)       | 161 (6.4)       |

Numbers are shown in pre-implementation period (January 1, 2014 to December 31, 2015) and implementation period (January 1, 2017 to December 31, 2018), for each group (intervention and control hospitals). Numbers may not sum to 100 because of rounding.

**Table S4. Comparison of Surgical Outcomes between Hospital Groups in Conventional and Ambulatory Surgery**

| Surgical Outcomes                      | Intervention Hospitals           |                              |                                      | Control Hospitals                |                              |                                      | Intervention vs Control Hospitals        |         |                                    |
|----------------------------------------|----------------------------------|------------------------------|--------------------------------------|----------------------------------|------------------------------|--------------------------------------|------------------------------------------|---------|------------------------------------|
|                                        | Pre-implementation<br>(n=47 515) | Implementation<br>(n=51 236) | Implementation vs Pre-implementation | Pre-implementation<br>(n=50 503) | Implementation<br>(n=51 941) | Implementation vs Pre-implementation | Adjusted Ratio of Odds Ratio<br>(95% CI) | P Value | Intraclass correlation coefficient |
|                                        | No. (%)                          | No. (%)                      | Adjusted Odds Ratio<br>(95% CI)      | No. (%)                          | No. (%)                      | Adjusted Odds Ratio<br>(95% CI)      |                                          |         |                                    |
| <b>Major adverse event<sup>a</sup></b> | 4136 (8.7)                       | 4238 (8.3)                   | 0.95 (0.90 to 1.00)                  | 4641 (9.2)                       | 4749 (9.1)                   | 1.07 (1.02 to 1.12)                  | 0.89 (0.82 to 0.95)                      | <0.001  | 0.032                              |
| <b>Death</b>                           | 585 (1.2)                        | 531 (1.0)                    | 0.85 (0.75 to 0.96)                  | 648 (1.3)                        | 650 (1.3)                    | 1.01 (0.90 to 1.13)                  | 0.84 (0.71 to 0.99)                      | 0.04    | 0.027                              |
| <b>Intensive care stay</b>             | 2158 (4.5)                       | 2091 (4.1)                   | 0.89 (0.82 to 0.95)                  | 2326 (4.6)                       | 2274 (4.4)                   | 1.04 (0.97 to 1.12)                  | 0.85 (0.77 to 0.94)                      | 0.002   | 0.148                              |
| <b>Reoperation</b>                     | 1632 (3.4)                       | 1736 (3.4)                   | 0.98 (0.91 to 1.05)                  | 1864 (3.7)                       | 2028 (3.9)                   | 1.10 (1.03 to 1.17)                  | 0.89 (0.81 to 0.98)                      | 0.02    | 0.025                              |
| <b>Severe complication</b>             | 1479 (3.1)                       | 1631 (3.2)                   | 1.03 (0.96 to 1.11)                  | 1702 (3.4)                       | 1838 (3.5)                   | 1.08 (1.00 to 1.15)                  | 0.96 (0.86 to 1.06)                      | 0.43    | 0.017                              |

A total of 201 195 patients were included in the analysis. Odds ratios were estimated using mixed-effect logistic regression models to compare surgical outcomes between pre-implementation and implementation periods in intervention and control hospitals, respectively. Ratio of odds ratios (ROR) captured the control chart impact by comparing the change in outcomes from pre-implementation to implementation periods between the intervention and control hospitals, based on a difference-in-difference approach. A ROR value less than unity indicated improvement caused by control charts in intervention versus control hospitals. Estimates with corresponding 95% confidence interval (95% CI) considered clustering of patients at the hospital level. Outcomes were adjusted for a risk score that considered age, sex, presence of comorbidities, emergency admission, date and operative procedure, main diagnosis, surgical procedure complexity, median household income for patient-level covariates, and status for hospital-level covariates.

<sup>a</sup> Major adverse event was a composite of surgical complications occurring at any hospital within 30 days following the surgical procedure inspired by Clavien-Dindo classification, including patient death, intensive care stay (at least 2 nights in intensive care or 5 nights in critical care), reoperation (open or laparoscopic digestive tract procedure), or severe complication (cardiac arrest, pulmonary embolism, sepsis, or surgical site infection).

**Table S5. Comparison of Surgical Outcomes by Hospital Group including Patients with Missing Household Income**

| Surgical Outcomes                      | No.<br>(%) in Intervention Hospitals |                              | No.<br>(%) in Control Hospitals  |                              | Intervention vs Control Hospitals           |         |                                          |
|----------------------------------------|--------------------------------------|------------------------------|----------------------------------|------------------------------|---------------------------------------------|---------|------------------------------------------|
|                                        | Pre-implementation<br>(n=37 783)     | Implementation<br>(n=37 665) | Pre-implementation<br>(n=41 737) | Implementation<br>(n=38 948) | Adjusted Ratio of<br>Odds Ratio<br>(95% CI) | P Value | Intraclass<br>correlation<br>coefficient |
| <b>Major adverse event<sup>a</sup></b> | 4103 (10.9)                          | 4186 (11.1)                  | 4611 (11.0)                      | 4675 (12.0)                  | 0.89 (0.83 to 0.96)                         | 0.002   | 0.033                                    |
| <b>Death</b>                           | 589 (1.6)                            | 532 (1.4)                    | 649 (1.6)                        | 655 (1.7)                    | 0.83 (0.70 to 0.99)                         | 0.03    | 0.029                                    |
| <b>Intensive care stay</b>             | 2159 (5.7)                           | 2095 (5.6)                   | 2336 (5.6)                       | 2283 (5.9)                   | 0.85 (0.77 to 0.94)                         | 0.001   | 0.151                                    |
| <b>Reoperation</b>                     | 1592 (4.2)                           | 1689 (4.5)                   | 1830 (4.4)                       | 1957 (5.0)                   | 0.91 (0.82 to 1.00)                         | 0.05    | 0.026                                    |
| <b>Severe complication</b>             | 1477 (3.9)                           | 1620 (4.3)                   | 1700 (4.1)                       | 1822 (4.7)                   | 0.96 (0.87 to 1.07)                         | 0.44    | 0.017                                    |

A total of 156 133 patients were included in the analysis. Missing household incomes for 771 patients were imputed by the mean household income of patients with available household income in the same hospital group (Intervention/Control) and period (Pre-implementation/Implementation). Using mixed-effect logistic regression models, ratio of odds ratios (ROR) captured the control chart impact by comparing the change in outcomes from pre-implementation to implementation periods between the intervention and control hospitals, based on a difference-in-differences approach. A ROR value less than unity indicated improvement caused by control charts in intervention versus control hospitals. Estimates with corresponding 95% confidence interval (95% CI) considered clustering of patients at the hospital level. Outcomes were adjusted for a risk score that considered age, sex, presence of comorbidities, emergency admission, date and operative procedure, main diagnosis, surgical procedure complexity, median household income for patient-level covariates, and status for hospital-level covariates.

<sup>a</sup> Major adverse event was a composite of surgical complications occurring at any hospital within 30 days following the surgical procedure inspired by Clavien-Dindo classification, including patient death, intensive care stay (at least 2 nights in intensive care or 5 nights in critical care), reoperation (open or laparoscopic digestive tract procedure), or severe complication (cardiac arrest, pulmonary embolism, sepsis, or surgical site infection).

**Table S6. Estimated Absolute Risk Differences and Number Needed to Treat**

|                                   | Intervention<br>Hospitals                  | Control<br>Hospitals | Intervention minus<br>Control Hospitals                   |                     |
|-----------------------------------|--------------------------------------------|----------------------|-----------------------------------------------------------|---------------------|
|                                   | Implementation minus<br>Pre-implementation |                      |                                                           |                     |
| Surgical Outcomes                 | Absolute Risk Difference, %<br>(95% CI)    |                      | Difference of<br>Absolute Risk Differences, %<br>(95% CI) |                     |
|                                   |                                            |                      | Number Needed to Treat<br>(95% CI) <sup>a</sup>           |                     |
| Major adverse events <sup>b</sup> | -0.4 (-0.8 to 0.0)                         | 0.5 (0.2 to 0.9)     | -0.9 (-1.4 to -0.4)                                       | 114 (70 to 280)     |
| Death                             | -0.2 (-0.4 to -0.1)                        | 0.0 (-0.2 to 0.2)    | -0.2 (-0.5 to 0.0)                                        | 435 (-895 to 2071)  |
| Intensive care stay               | -0.4 (-0.7 to -0.2)                        | 0.2 (-0.1 to 0.4)    | -0.6 (-1.0 to -0.3)                                       | 161 (102 to 371)    |
| Reoperation                       | -0.0 (-0.3 to 0.3)                         | 0.4 (0.1 to 0.6)     | -0.4 (-0.8 to -0.0)                                       | 263 (104 to 1701)   |
| Severe complications              | 0.1 (-0.2 to 0.4)                          | 0.3 (0.0 to 0.5)     | -0.2 (-0.5 to 0.2)                                        | 667 (-4421 to 8684) |

CI, confidence interval

<sup>a</sup> The number needed to treat was calculated by dividing -1 by the difference of the absolute risk difference, which was derived from mixed-effect logistic regression models and marginal standardisation method comparing surgical outcomes between the pre-implementation and implementation periods in the intervention and control hospitals. Corresponding 95% CI were computed from non-parametric bootstrap based on 1000 replicates. Marginal standardised risks of outcomes in each hospital groups and periods are shown in Figure S3.

<sup>b</sup> Major adverse events was a composite of surgical complications occurring at any hospital within 30 days following the surgical procedure inspired by Clavien-Dindo classification, including patient death, intensive care stay (at least 2 nights in intensive care or 5 nights in critical care), reoperation (open or laparoscopic digestive tract procedure), or severe complication (cardiac arrest, pulmonary embolism, sepsis, or surgical site infection).

**Table S7. Estimated Relative Risk Differences and Major Adverse Events Avoided**

|                                   | Intervention<br>Hospitals                  | Control<br>Hospitals | Intervention minus<br>Control Hospitals                  | 20 Intervention Hospitals<br>in 2017-2018<br>(Implementation Period) | 134 French Eligible Hospitals<br>in 2018         |                          |                                                    |
|-----------------------------------|--------------------------------------------|----------------------|----------------------------------------------------------|----------------------------------------------------------------------|--------------------------------------------------|--------------------------|----------------------------------------------------|
|                                   | Implementation minus<br>Pre-implementation |                      |                                                          |                                                                      |                                                  |                          |                                                    |
| Surgical Outcomes                 | Relative Risk Difference, %<br>(95% CI)    |                      | Difference of<br>Relative Risk Difference, %<br>(95% CI) | No. of<br>observed cases                                             | No. of<br>avoided cases<br>(95% CI) <sup>a</sup> | No. of<br>observed cases | No. of<br>avoidable cases<br>(95% CI) <sup>a</sup> |
| Major adverse events <sup>b</sup> | -3.3 (-6.9 to 0.2)                         | 4.9 (1.5 to 8.4)     | -8.1 (-13.2 to -3.2)                                     | 4163                                                                 | 362 (141 to 573)                                 | 12 264                   | 981 (394 to 1515)                                  |
| Death                             | -14.1 (-22.9 to -3.2)                      | 0.8 (-8.9 to 11.9)   | -14.9 (-28.8 to -0.4)                                    | 528                                                                  | 93 (2 to 183)                                    | 1705                     | 256 (7 to 450)                                     |
| Intensive care stay               | -8.3 (-12.9 to -3.3)                       | 3.8 (-1.0 to 9.1)    | -12.0 (-19.1 to -5.3)                                    | 2080                                                                 | 284 (117 to 442)                                 | 5877                     | 705 (309 to 1047)                                  |
| Reoperation                       | -0.1 (-6.7 to 6.7)                         | 9.1 (2.6 to 15.7)    | -9.2 (-18.9 to -0.1)                                     | 1682                                                                 | 146 (1 to 328)                                   | 5057                     | 405 (2 to 855)                                     |
| Severe complications              | 3.4 (-3.7 to 10.9)                         | 7.0 (0.1 to 13.5)    | -3.6 (-12.7 to 6.5)                                      | 1610                                                                 | 67 (-99 to 201)                                  | 4807                     | 192 (-303 to 548)                                  |

CI, confidence interval

<sup>a</sup> The number of avoided cases among patients operated in intervention hospitals during the implementation period and the number of avoidable cases in hospitals eligible for Shewhart study (Figure 2) were estimated from the difference of relative risks difference derived from mixed-effect logistic regression models and marginal standardisation method comparing surgical outcomes between the pre-implementation and implementation periods in the intervention and control hospitals. Corresponding 95% CI were computed from non-parametric bootstrap based on 1000 replicates. Marginal standardised risks of outcomes in each hospital groups and periods are shown in Figure S3.

<sup>b</sup> Major adverse events was a composite of surgical complications occurring at any hospital within 30 days following the surgical procedure inspired by Clavien-Dindo classification, including patient death, intensive care stay (at least 2 nights in intensive care or 5 nights in critical care), reoperation (open or laparoscopic digestive tract procedure), or severe complication (cardiac arrest, pulmonary embolism, sepsis, or surgical site infection).

Figure S1. Geographic Location of Participating Hospitals

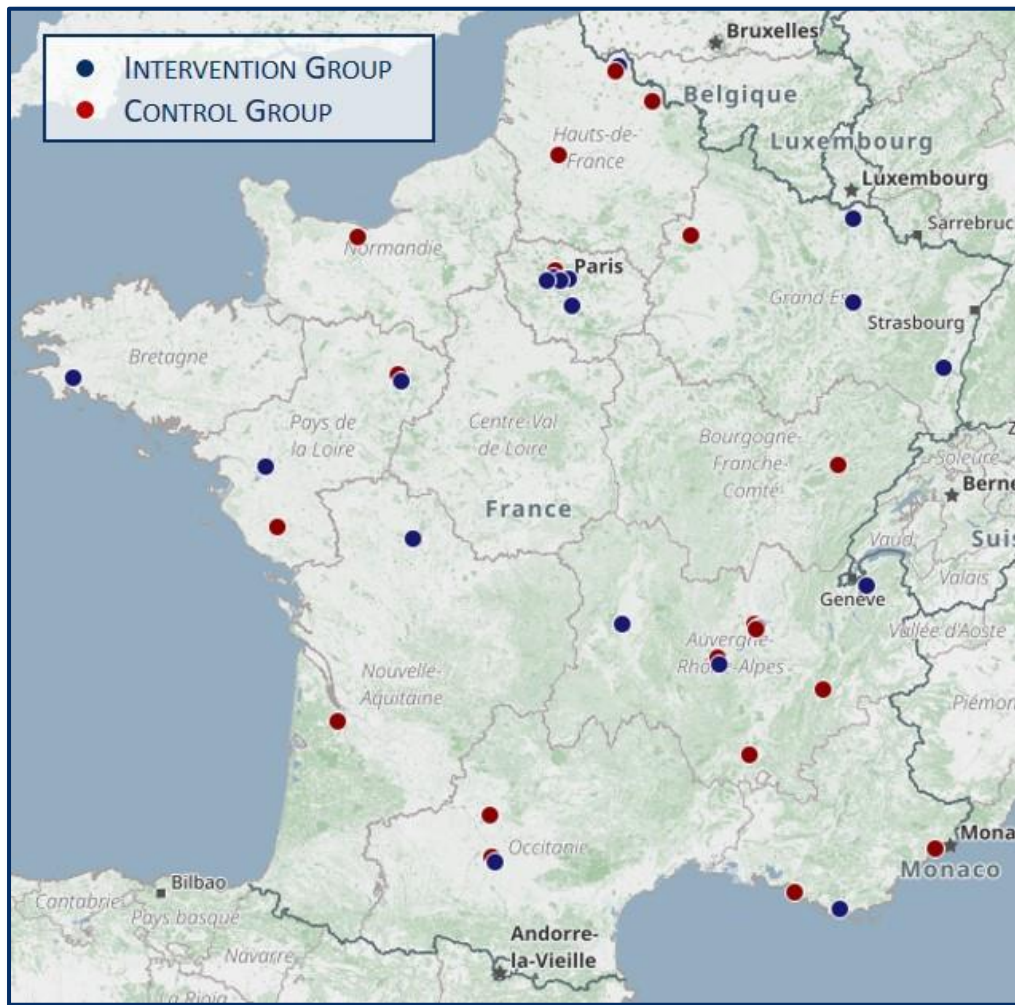

Figure S2. Surgical Outcomes by Control Chart Implementation in Conventional and Ambulatory Surgery

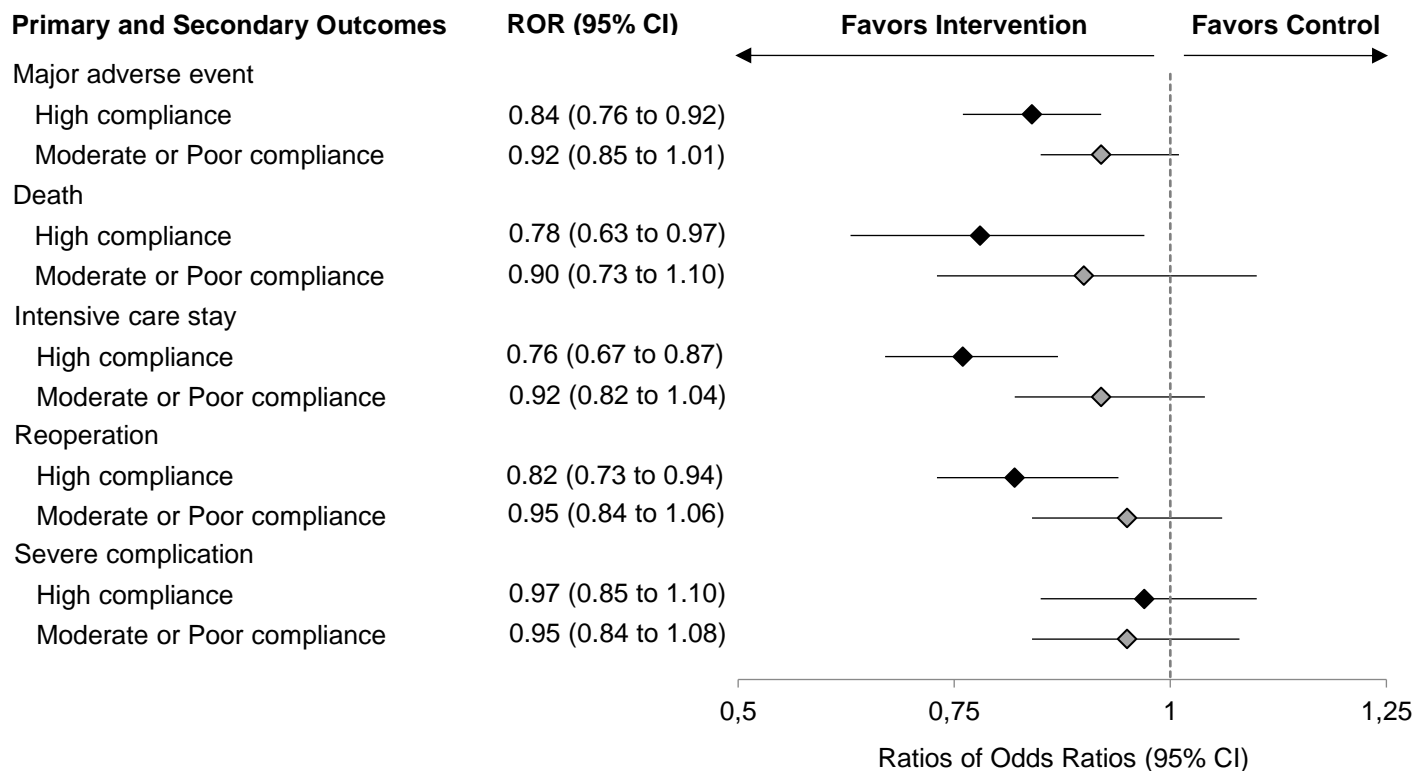

201 195 patients were included in the analysis. Hospitals were regarded as highly compliant for control chart utilization with an implementation score of 5 to 6, moderately compliant with a score of 3 to 4, and poorly compliant with a score of 2. Ratio of odds ratios (ROR) captured the control chart impact by comparing the change in outcomes from the pre-implementation to implementation period between the highly compliant intervention hospitals and the control hospitals (black diamonds), and between the moderate to poor compliance intervention hospitals and the control hospitals (grey diamonds). A ROR value less than unity indicated an improvement caused by control chart use in the intervention hospitals (high compliance or moderate-to-poor compliance) compared to control hospitals. Bars denote 95% confidence intervals (95% CI) that considered patient clustering at the hospital level. Outcomes were adjusted for a risk score that considered age, sex, presence of comorbidities, emergency admission, date and operative procedure, main diagnosis, surgical procedure complexity, median household income regarding patient-level covariates, and status for hospital-level covariates. Major adverse event was a composite of surgical complications occurring at any hospital within 30 days following surgical procedure inspired by Clavien-Dindo classification, including patient death, intensive care stay (at least 2 nights in intensive care or 5 nights in critical care), reoperation (open or laparoscopic digestive tract procedure) or severe complication (cardiac arrest, pulmonary embolism, sepsis, or surgical site infection).



Figure S3. Surgical Outcomes Rates by Study Group and Period in Conventional Surgery

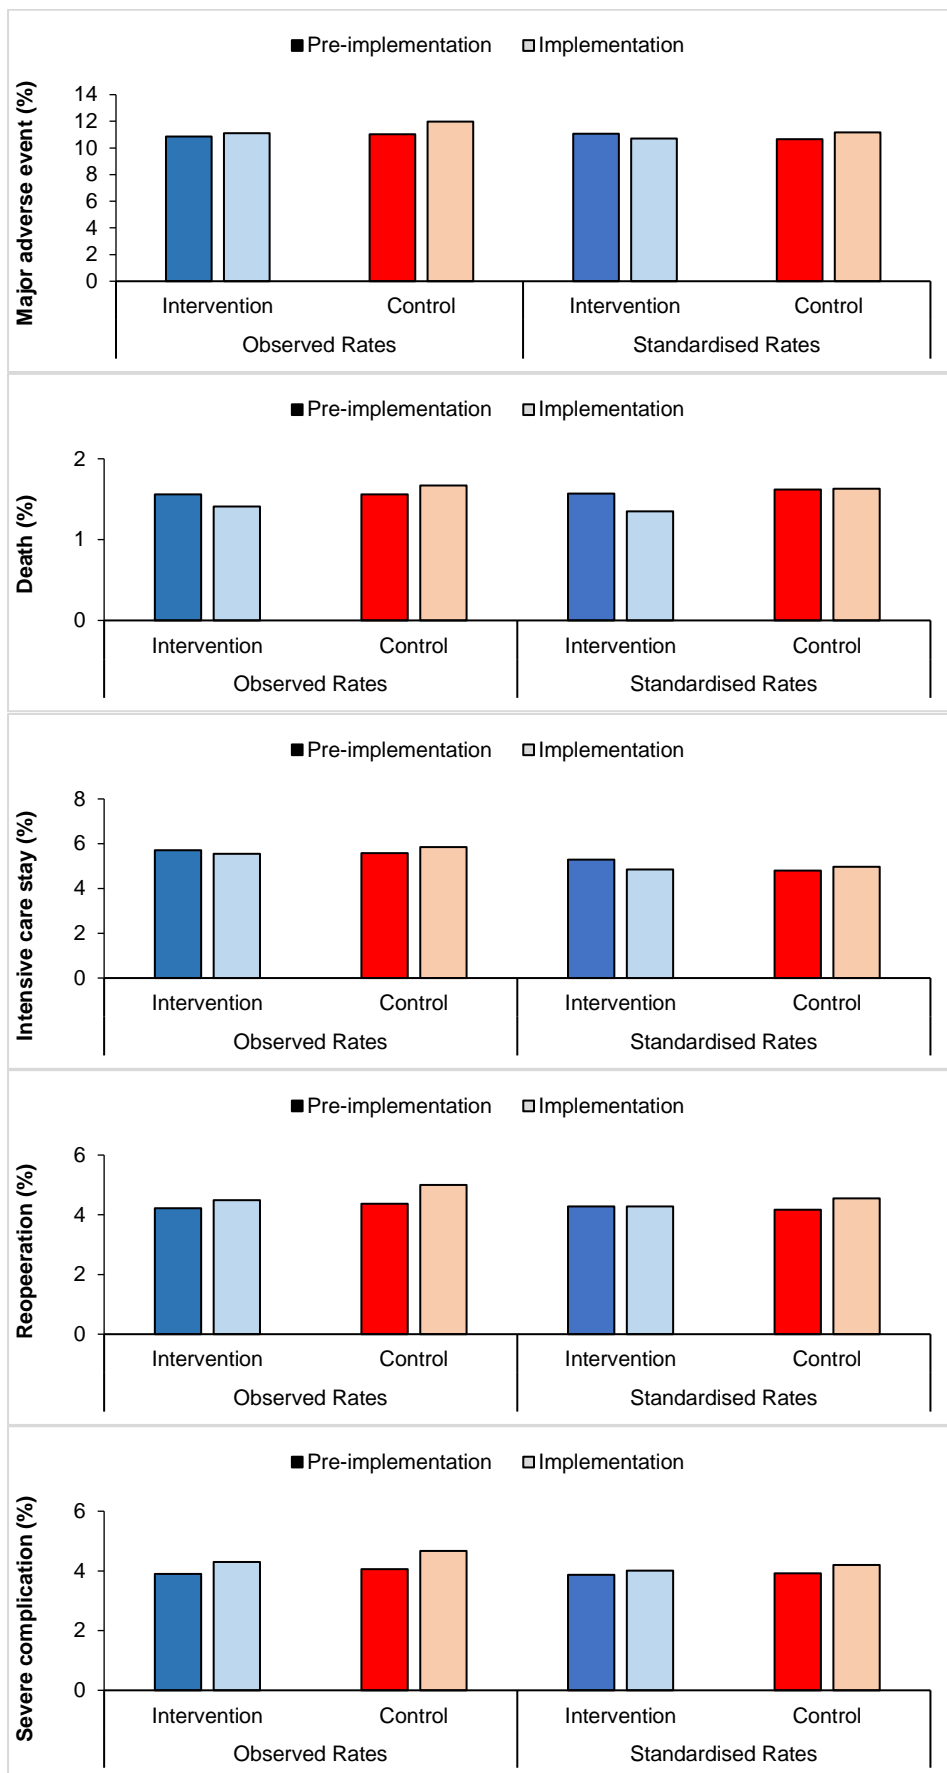

155 362 patients were included in the analysis. Using estimated parameters obtained from mixed-effect logistic regression models and marginal standardisation method, we determined marginal standardised risks of outcomes in each hospital groups and periods.

**Figure S4. Surgical Outcomes Rates by Study Group and Period in Conventional and Ambulatory Surgery**

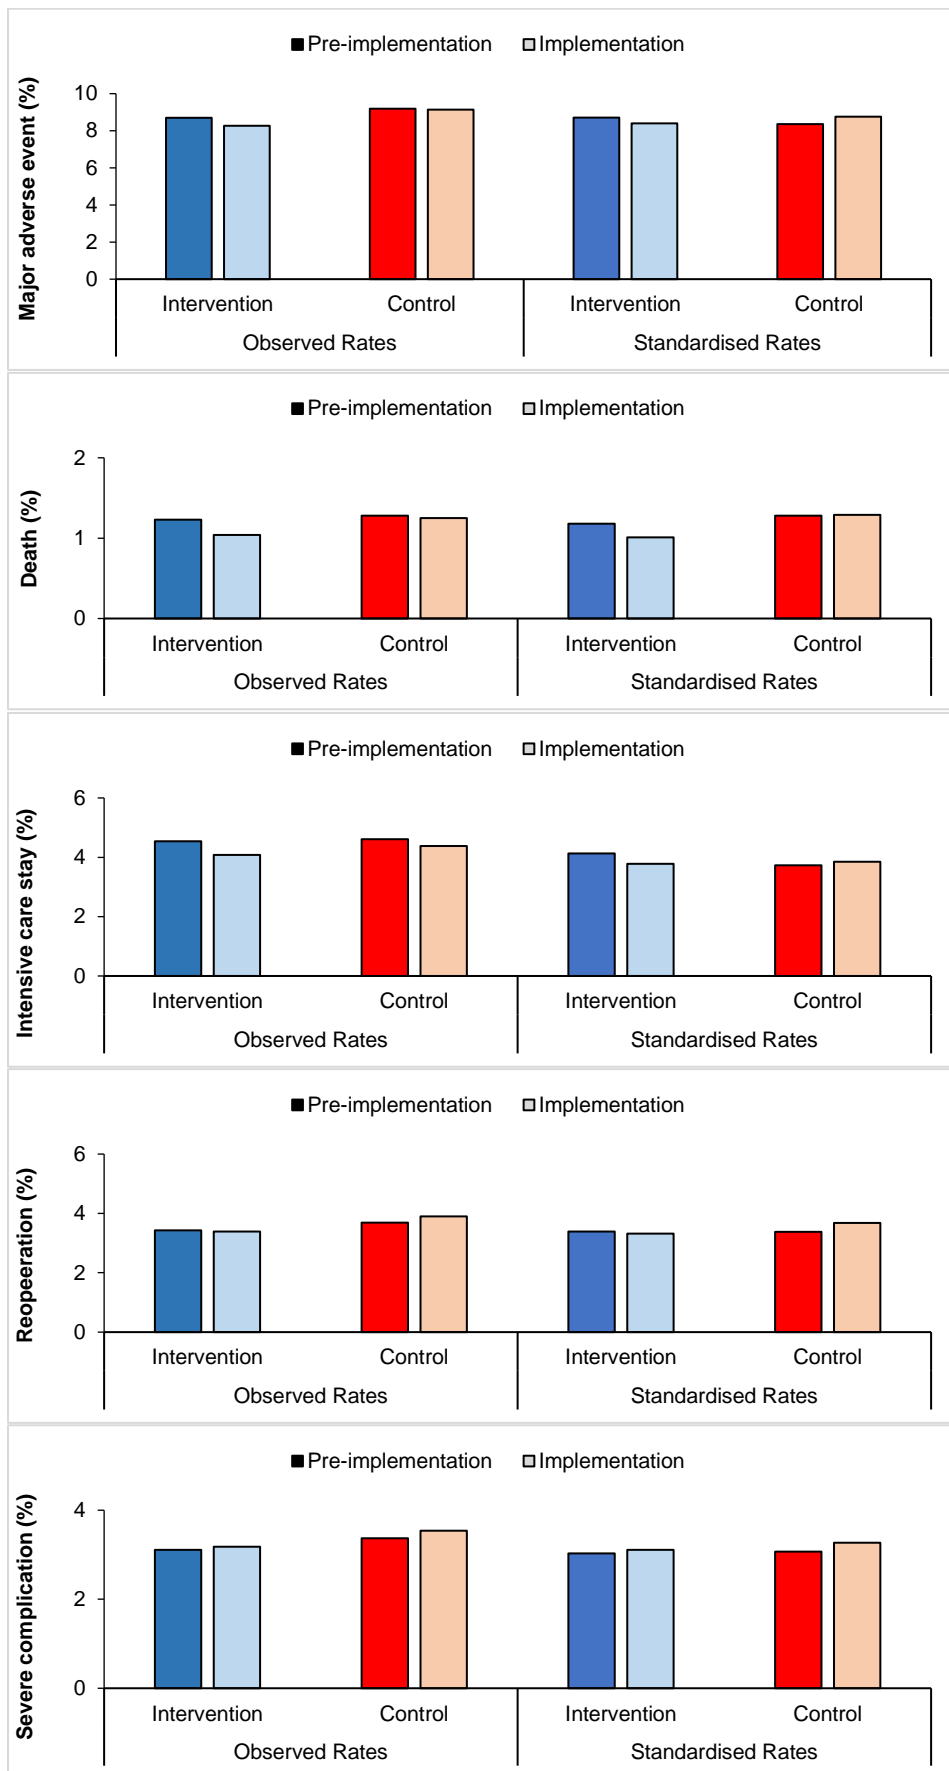

201 195 patients were included in the analysis. Using estimated parameters obtained from mixed-effect logistic regression models and marginal standardisation method, we determined marginal standardised risks of outcomes in each hospital groups and periods.

**Figure S5. Difference in Standardised Rates of Major Adverse Events from Pre-implementation Period to Implementation Period by Hospital in Conventional Surgery**

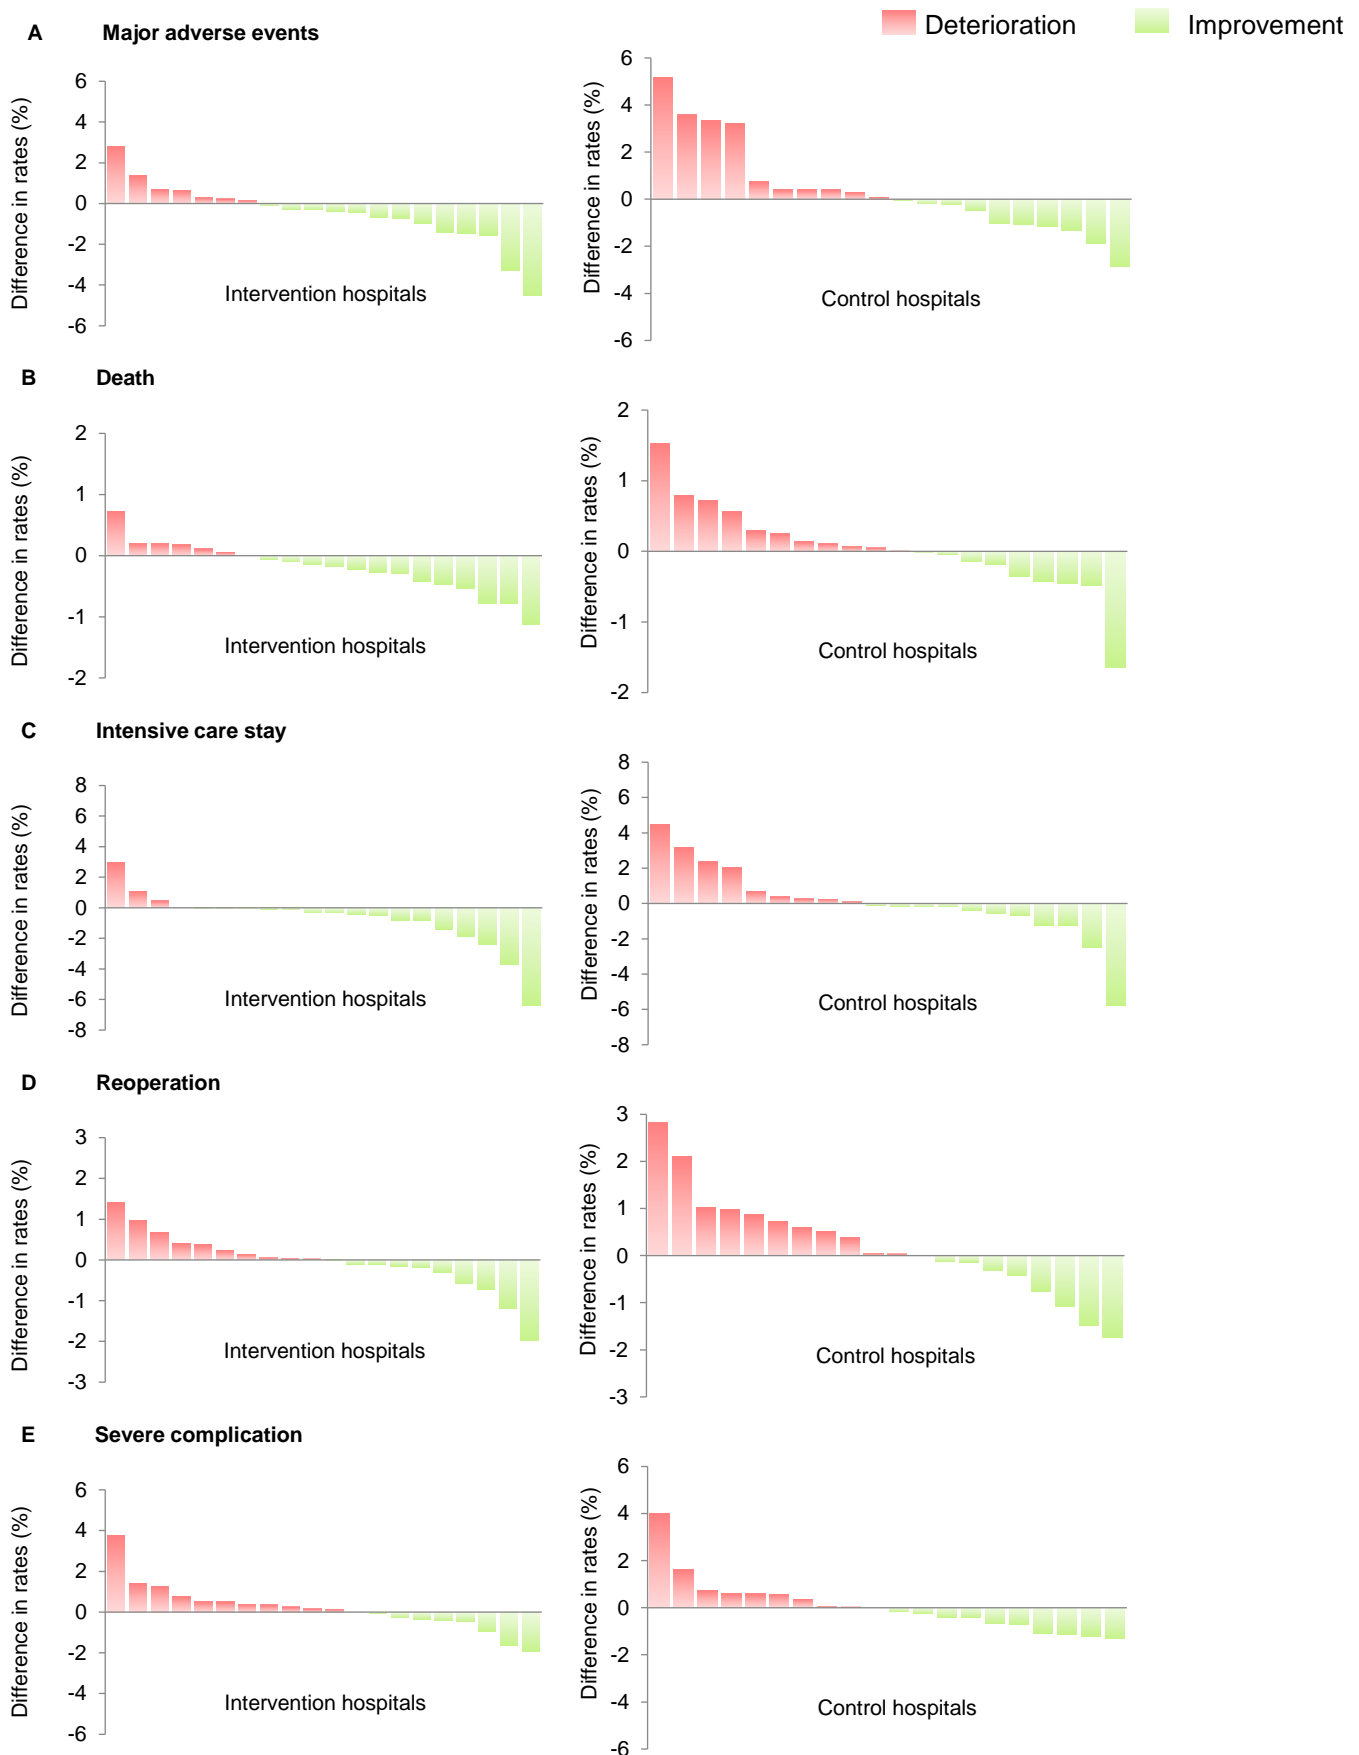

155 362 patients were included in the analysis. Standardised rates of primary and secondary outcomes per hospital were calculated for each hospital according to the formula = (observed hospital rates ÷ expected hospital rates) × average observed hospitals rates over pre-implementation and implementation periods. Expected hospital rates were calculated for each hospital, using the expected number of events corresponding to the sum of the patients' risk scores operated in the hospital.

**Figure S6. Difference in Standardised Rates of Major Adverse Events from Pre-implementation Period to Implementation Period by Hospital in Conventional and Ambulatory Surgery**

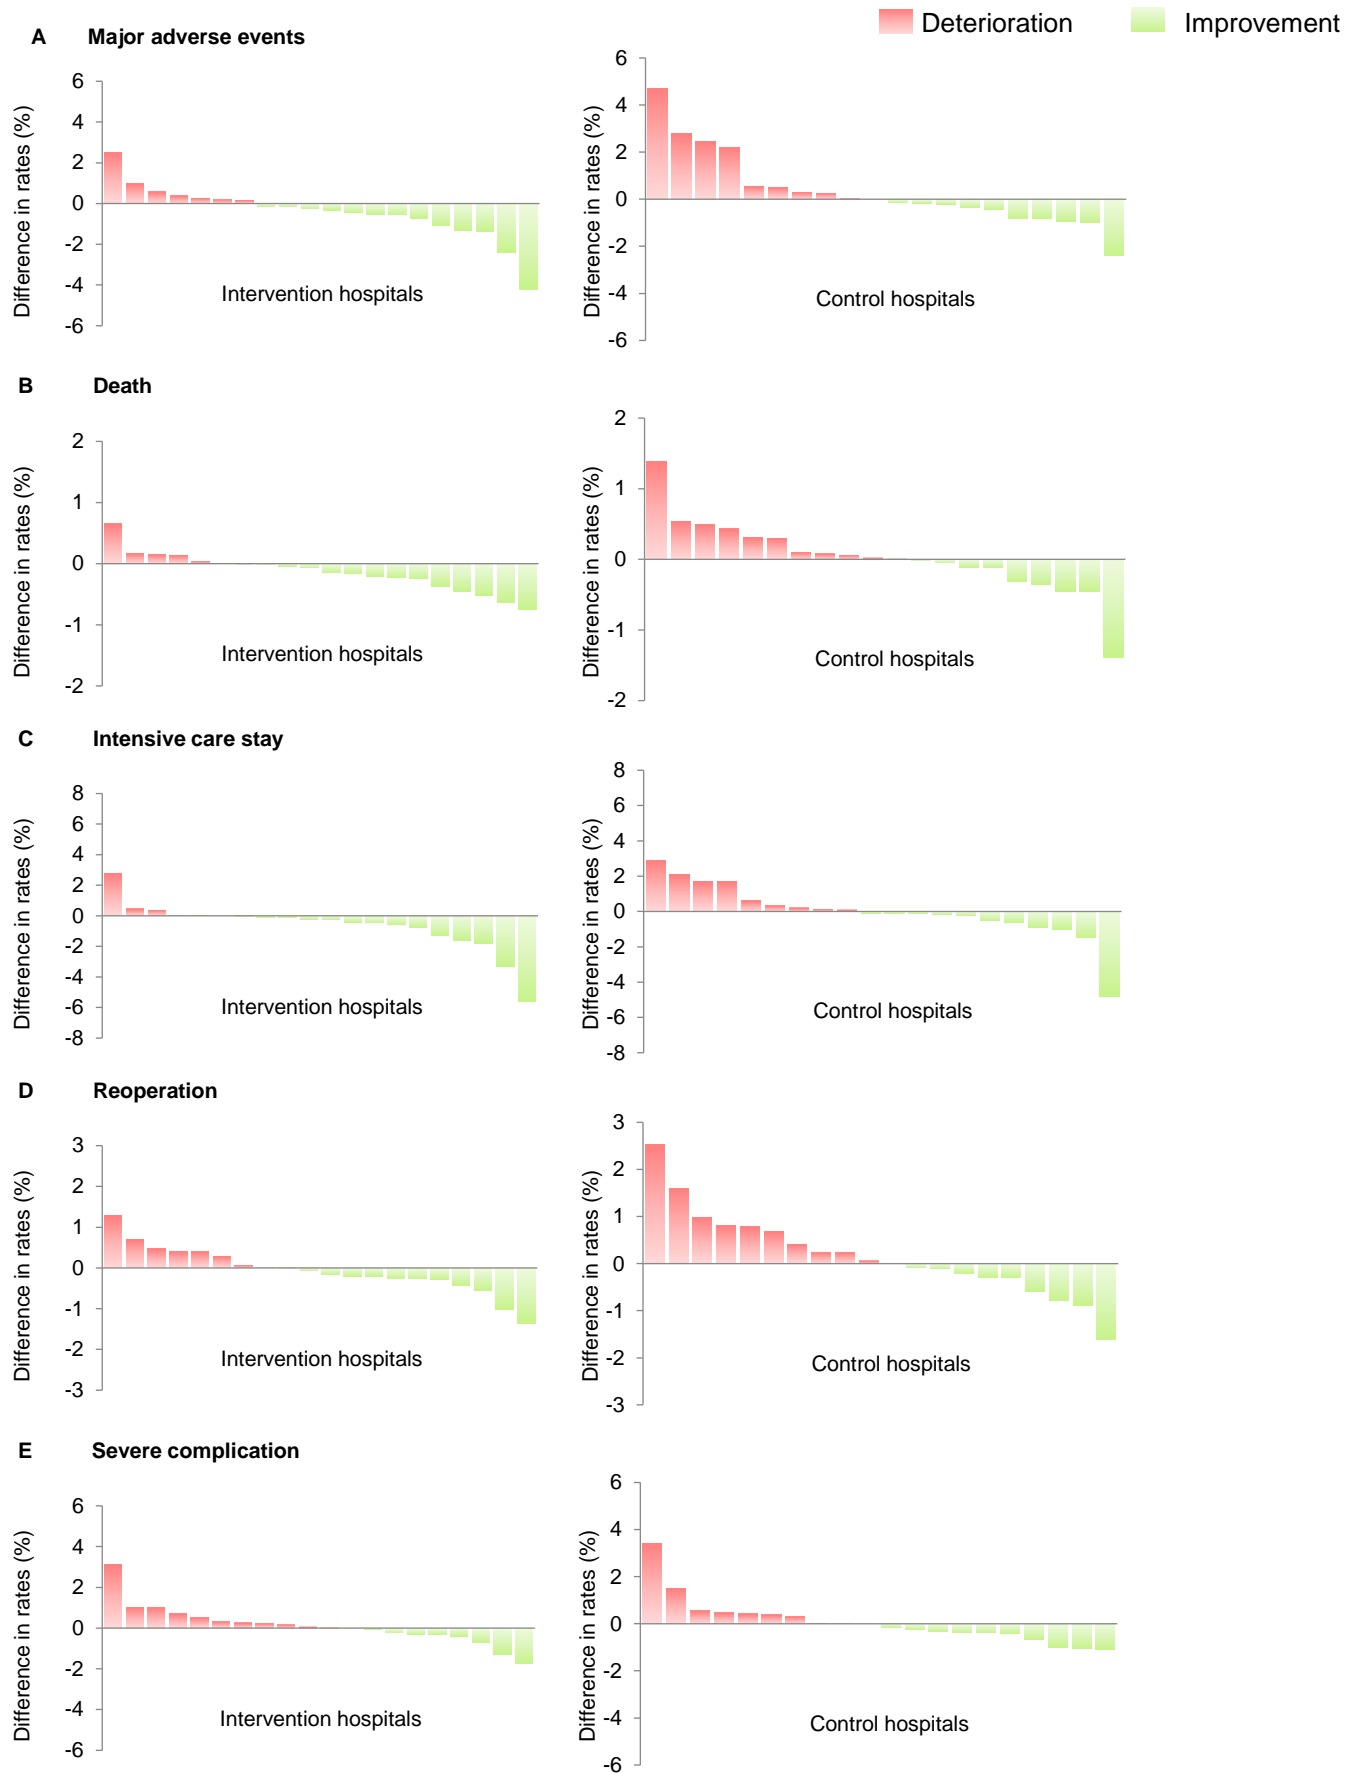

201 195 patients were included in the analysis. Standardised rates of primary and secondary outcomes per hospital were calculated for each hospital according to the formula = (observed hospital rates ÷ expected hospital rates) × average observed hospitals rates over pre-implementation and implementation periods. Expected hospital rates were calculated for each hospital, using the expected number of events corresponding to the sum of the patients' risk scores operated in the hospital.
