# Supplementary figures and images for: Effect of monitoring surgical outcomes using control charts to reduce major adverse events in patients: cluster randomised trial
Source: PubMed Central journal article supplement — BMJ. 2020 Nov 4;371:m3840. doi: 10.1136/bmj.m3840 (PMC7610189; doi:10.1136/bmj.m3840), 2020-11-04

Figure 1.

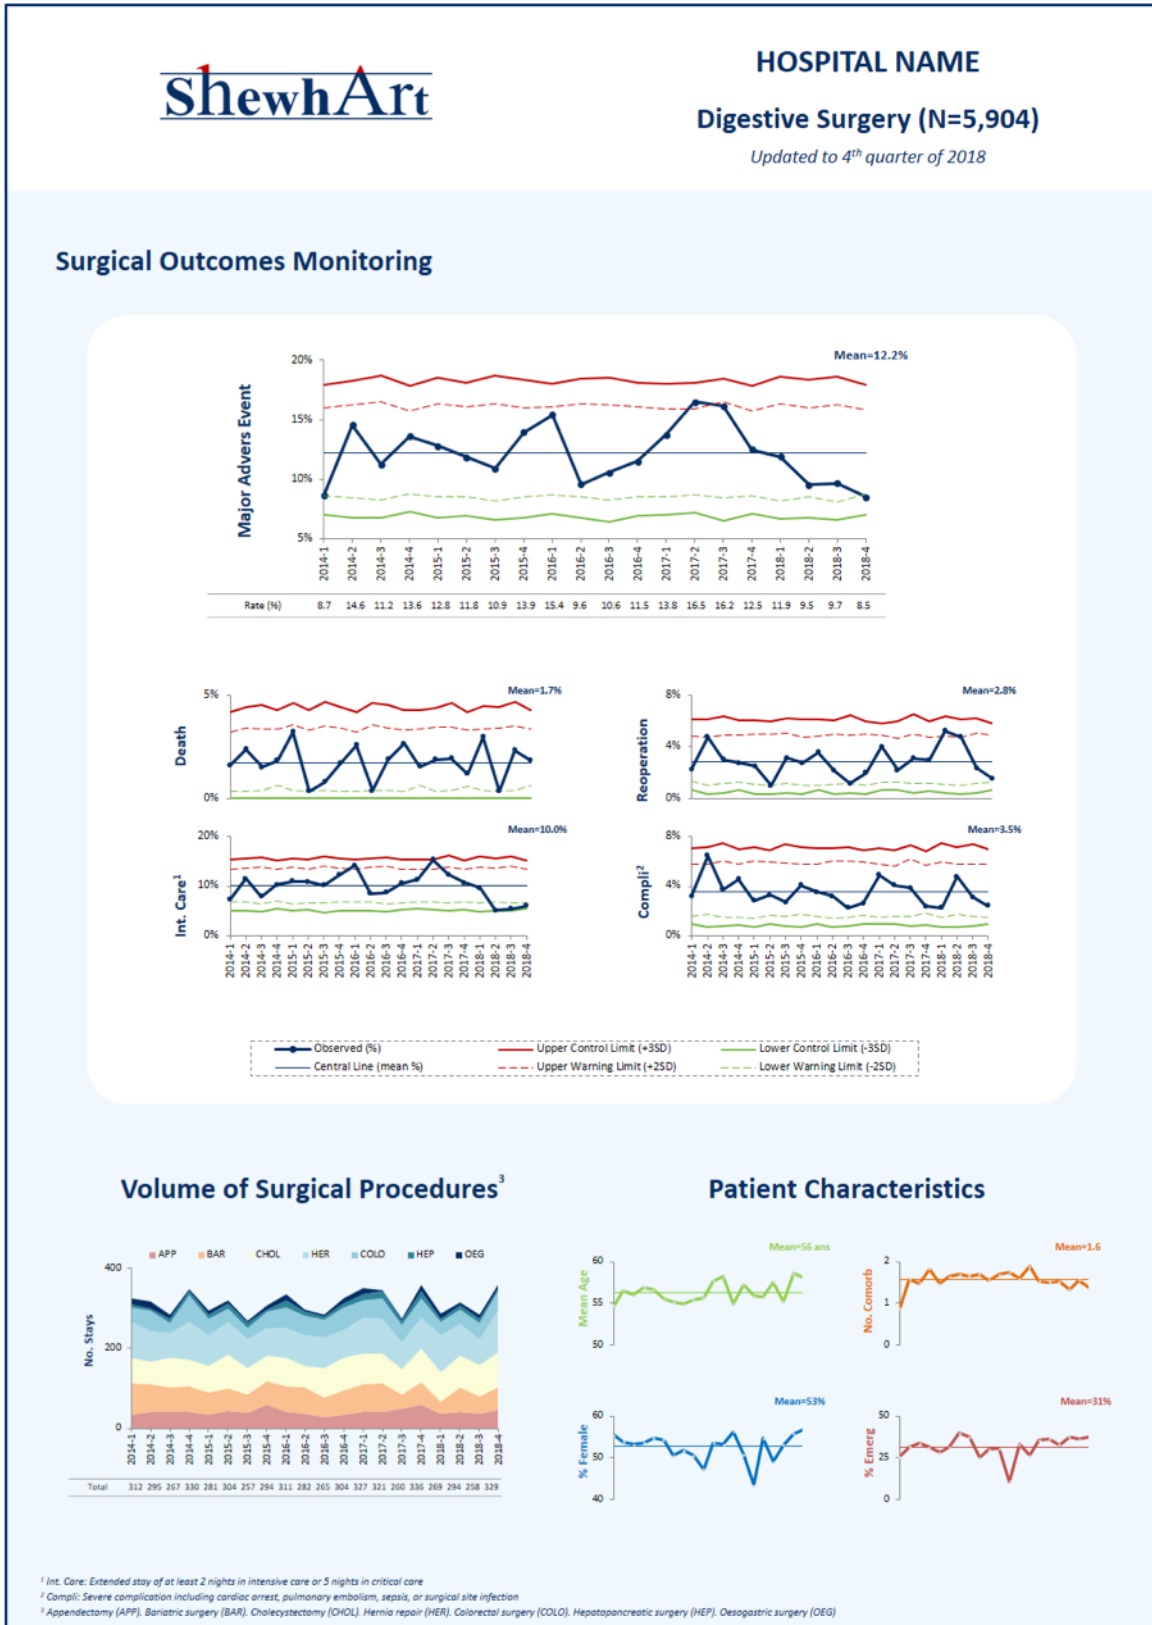

Fig 1 Sample poster of set of control charts displayed in the operating room

Supplement: duca055782.wf1.pdf [file duca055782.wf1.pdf]
